# Supplementary material for: Controlled Synthesis of Topologically Diverse Polyrotaxanes by Ring-Opening Polymerization of Mechanically Interlocked Monomers
Source: Research Square preprint supplement (doi:10.21203/rs.3.rs-7589432/v1), 2025-09-15

## checkCIF/PLATON report

Structure factors have been supplied for datablock(s) a

THIS REPORT IS FOR GUIDANCE ONLY. IF USED AS PART OF A REVIEW PROCEDURE FOR PUBLICATION, IT SHOULD NOT REPLACE THE EXPERTISE OF AN EXPERIENCED CRYSTALLOGRAPHIC REFEREE.

No syntax errors found.      CIF dictionary      Interpreting this report

### Datablock: a

---

|                        |                           |                                       |
|------------------------|---------------------------|---------------------------------------|
| Bond precision:        | C-C = 0.0032 A            | Wavelength=1.54184                    |
| Cell:                  | a=8.9459 (1)              | b=17.2753 (2)      c=21.8372 (3)      |
|                        | alpha=110.107 (1)         | beta=91.709 (1)      gamma=93.859 (1) |
| Temperature:           | 100 K                     |                                       |
|                        | Calculated                | Reported                              |
| Volume                 | 3156.86 (7)               | 3156.86 (7)                           |
| Space group            | P -1                      | P -1                                  |
| Hall group             | -P 1                      | -P 1                                  |
| Moiety formula         | C43 H61 N7 O9, C16 H32 O8 | C16 H32 O8, C43 H61 N7 O9             |
| Sum formula            | C59 H93 N7 O17            | C59 H93 N7 O17                        |
| Mr                     | 1172.40                   | 1172.40                               |
| Dx, g cm <sup>-3</sup> | 1.233                     | 1.233                                 |
| Z                      | 2                         | 2                                     |
| Mu (mm <sup>-1</sup> ) | 0.744                     | 0.744                                 |
| F000                   | 1264.0                    | 1264.0                                |
| F000'                  | 1268.05                   |                                       |
| h,k,lmax               | 11,21,27                  | 11,21,27                              |
| Nref                   | 13279                     | 12687                                 |
| Tmin,Tmax              | 0.875,0.915               | 0.297,1.000                           |
| Tmin'                  | 0.824                     |                                       |

Correction method= # Reported T Limits: Tmin=0.297 Tmax=1.000  
AbsCorr = MULTI-SCAN

Data completeness= 0.955      Theta(max)= 76.544

|                                 |                                   |
|---------------------------------|-----------------------------------|
| R(reflections)= 0.0730 ( 10763) | wR2(reflections)= 0.2149 ( 12687) |
| S = 1.062                       | Npar= 820                         |

---

The following ALERTS were generated. Each ALERT has the format

**test-name\_ALERT\_alert-type\_alert-level.**

Click on the hyperlinks for more details of the test.

---

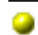

### Alert level C

DIFMX02\_ALERT\_1\_C The maximum difference density is > 0.1\*ZMAX\*0.75

The relevant atom site should be identified.

PLAT042\_ALERT\_1\_C Calc. and Reported MoietyFormula Strings Differ Please Check

Calc: C43 H61 N7 O9, C16 H32 O8

Rep.: C16 H32 O8, C43 H61 N7 O9

PLAT094\_ALERT\_2\_C Ratio of Maximum / Minimum Residual Density .... 2.10 Report

PLAT097\_ALERT\_2\_C Large Reported Max. (Positive) Residual Density 0.77 eA-3

PLAT230\_ALERT\_2\_C Hirshfeld Test Diff for N3 --N4 . 5.1 s.u.

PLAT906\_ALERT\_3\_C Large K Value in the Analysis of Variance ..... 3.832 Check

PLAT911\_ALERT\_3\_C Missing FCF Refl Between Thmin & STh/L= 0.600 57 Report

-10 4 0, -8-12 1, 10 -3 1, -10 4 1, 2 16 1, 10 -2 2,

-10 3 2, -10 4 2, 2 16 2, -10 2 3, -10 3 3, -10 4 3,

-10 5 3, -10 6 3, -10 7 3, 10 -1 4, -10 3 4, -10 4 4,

-10 5 4, -10 6 4, -10 7 4, 7-16 5, -9-10 5, 10 0 5,

-10 1 5, 10 1 5, -10 3 5, -10 4 5, -10 5 5, -10 6 5,

( 27 More Missing: see the .ckf listing file)

---

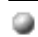

### Alert level G

PLAT002\_ALERT\_2\_G Number of Distance or Angle Restraints on AtSite 14 Note

PLAT003\_ALERT\_2\_G Number of Uiso or U(i,j) Restrained non-H-Atoms 14 Report

PLAT007\_ALERT\_5\_G Number of Unrefined Donor-H Atoms ..... 1 Report  
H1

PLAT072\_ALERT\_2\_G SHELXL First Parameter in WGHT Unusually Large 0.15 Report

PLAT154\_ALERT\_1\_G The s.u.'s on the Cell Angles are Equal ..(Note) 0.001 Degree

PLAT175\_ALERT\_4\_G The CIF-Embedded .res File Contains SAME Records 2 Report

PLAT178\_ALERT\_4\_G The CIF-Embedded .res File Contains SIMU Records 2 Report

PLAT188\_ALERT\_3\_G A Non-default SIMU Restraint Value has been used 0.0100 Report

PLAT188\_ALERT\_3\_G A Non-default SIMU Restraint Value has been used 0.0100 Report

PLAT189\_ALERT\_3\_G A Non-default SAME Restraint Value for First Par 0.0100 Report

PLAT189\_ALERT\_3\_G A Non-default SAME Restraint Value for First Par 0.0100 Report

PLAT301\_ALERT\_3\_G Main Residue Disorder .....(Resd 1) 10% Note

PLAT412\_ALERT\_2\_G Short Intra XH3 .. XHn H31 ..H34F . 2.05 Ang.

x,y,z = 1\_555 Check

PLAT412\_ALERT\_2\_G Short Intra XH3 .. XHn H37 ..H42C . 2.09 Ang.

x,y,z = 1\_555 Check

PLAT412\_ALERT\_2\_G Short Intra XH3 .. XHn H37 ..H35A . 2.14 Ang.

x,y,z = 1\_555 Check

PLAT412\_ALERT\_2\_G Short Intra XH3 .. XHn H37 ..H42F . 2.08 Ang.

x,y,z = 1\_555 Check

PLAT860\_ALERT\_3\_G Number of Least-Squares Restraints ..... 120 Note

PLAT912\_ALERT\_4\_G Missing # of FCF Reflections Above STh/L= 0.600 535 Note

PLAT933\_ALERT\_2\_G Number of HKL-OMIT Records in Embedded .res File 3 Note

-8 5 12, -10 2 9, -10 1 5,

PLAT941\_ALERT\_3\_G Average HKL Measurement Multiplicity ..... 3.2 Low

PLAT969\_ALERT\_5\_G The 'Henn et al.' R-Factor-gap value ..... 3.396 Note

Predicted wr2: Based on SigI\*\*2 6.33 or SHELX Weight 20.23

PLAT978\_ALERT\_2\_G Number C-C Bonds with Positive Residual Density. 6 Info

---

0 **ALERT level A** = Most likely a serious problem - resolve or explain  
0 **ALERT level B** = A potentially serious problem, consider carefully  
7 **ALERT level C** = Check. Ensure it is not caused by an omission or oversight  
22 **ALERT level G** = General information/check it is not something unexpected

3 ALERT type 1 CIF construction/syntax error, inconsistent or missing data  
12 ALERT type 2 Indicator that the structure model may be wrong or deficient  
9 ALERT type 3 Indicator that the structure quality may be low  
3 ALERT type 4 Improvement, methodology, query or suggestion  
2 ALERT type 5 Informative message, check

---

It is advisable to attempt to resolve as many as possible of the alerts in all categories. Often the minor alerts point to easily fixed oversights, errors and omissions in your CIF or refinement strategy, so attention to these fine details can be worthwhile. In order to resolve some of the more serious problems it may be necessary to carry out additional measurements or structure refinements. However, the purpose of your study may justify the reported deviations and the more serious of these should normally be commented upon in the discussion or experimental section of a paper or in the "special\_details" fields of the CIF. checkCIF was carefully designed to identify outliers and unusual parameters, but every test has its limitations and alerts that are not important in a particular case may appear. Conversely, the absence of alerts does not guarantee there are no aspects of the results needing attention. It is up to the individual to critically assess their own results and, if necessary, seek expert advice.

### **Publication of your CIF in IUCr journals**

A basic structural check has been run on your CIF. These basic checks will be run on all CIFs submitted for publication in IUCr journals (*Acta Crystallographica*, *Journal of Applied Crystallography*, *Journal of Synchrotron Radiation*); however, if you intend to submit to *Acta Crystallographica Section C* or *E* or *IUCrData*, you should make sure that full publication checks are run on the final version of your CIF prior to submission.

### **Publication of your CIF in other journals**

Please refer to the *Notes for Authors* of the relevant journal for any special instructions relating to CIF submission.

---

Datablock a - ellipsoid plot

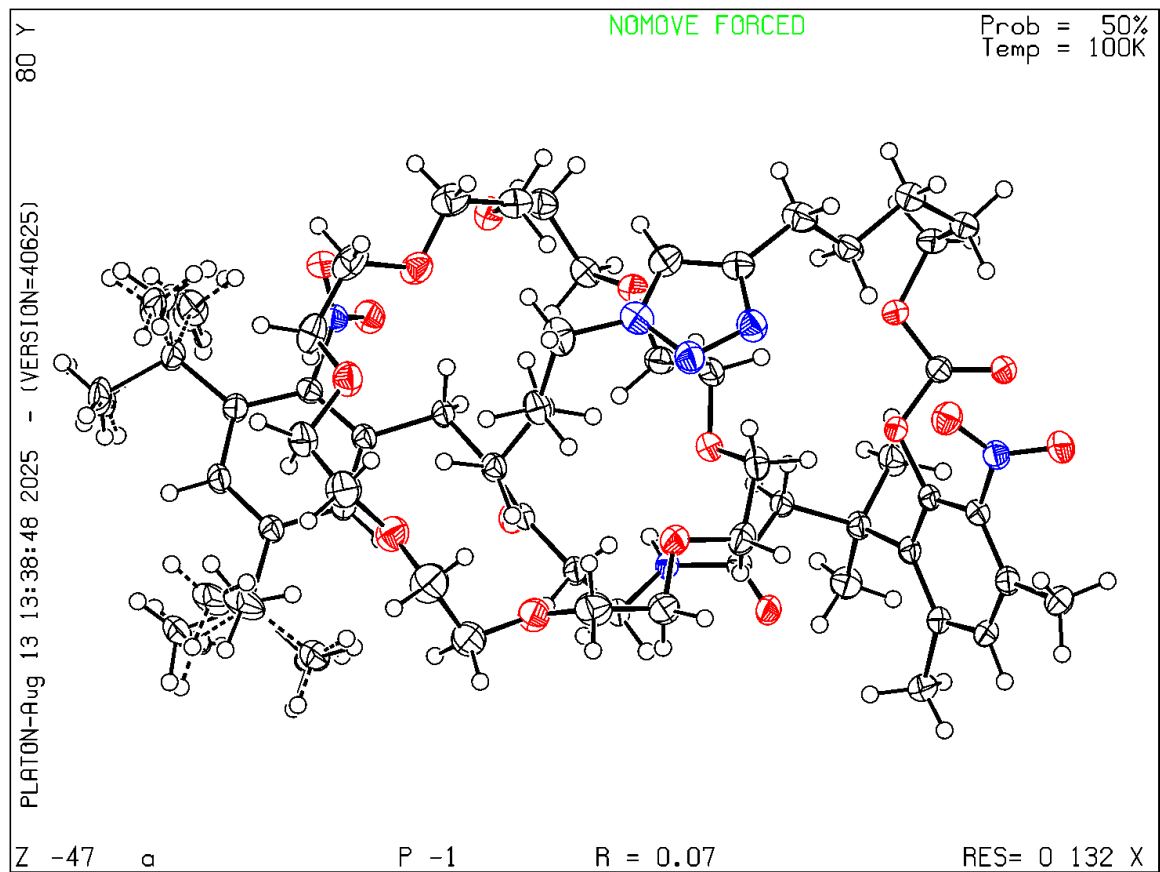

Supplement: Supplementary file 1 [file 0cf46d1adac7310605fe1a92.pdf]
