# Supplementary material for: Controlled Synthesis of Topologically Diverse Polyrotaxanes by Ring-Opening Polymerization of Mechanically Interlocked Monomers
Source: Research Square preprint supplement (doi:10.21203/rs.3.rs-7589432/v1), 2025-09-15
Supplement: Supplementary file 1 [file 5a25f8b064eccaeea6e04ea9.docx]

**Controlled Synthesis of Topologically Diverse Polyrotaxanes by Ring-Opening Polymerization of Mechanically Interlocked Monomers**

Jinlei Zhou1,6, Wenseng Chen2,3,6, Zengquan Tian5, Libo Jing1, Jingyao Yang1, Zihang Song1, Kaiyuan Wang4, Zhenjie Zhang4, Dong-Sheng Guo5, Ke Zhang2,3, Kang Cai1

*1 College of Chemistry, State Key Laboratory of Elemento-Organic Chemistry, Frontiers Science Center for New Organic Matter, Nankai University, 94 Weijin Road, Nankai District, Tianjin 300071, China.*

*2 Laboratory of Polymer Physics and Chemistry, Beijing National Laboratory for Molecular Sciences, Institute of Chemistry, The Chinese Academy of Sciences, Beijing 100190, P. R. China..*

*3 University of Chinese Academy of Sciences, Beijing 100049, China.*

*4 State Key Laboratory of Medicine Chemistry Biology, College of Chemistry, Nankai University, Tianjin 300071, China.*

*5 Key Laboratory of Functional Polymer Materials (Ministry of Education), Collaborative Innovation Center of Chemical Science and Engineering, State Key Laboratory of Elemento-Organic Chemistry, Nankai University, Tianjin 300071, China.*

*6 These author contribute equally to this work. Correspondence and requests for materials should be addressed to K. C.* *(Email:* [*kangcai@nankai.edu.cn*](mailto:kangcai@nankai.edu.cn)*) and K. Z. (Email: kzhang@iccas.ac.cn)*

**Table of Contents**

**1.** **General Methods 2**

**2. Synthetic Protocols 3**

**3. NMR Spectroscopy14**

**4.** **Homopolymerization 31**

**5. Crystallographic Characterization 38**

**6. Molecular dynamics simulations 39**

**7. Theoretical Calculations 40**

**8.** **References 54**

**1. General Methods**

All reagents were purchased from commercial suppliers and used without further purification. Compound **F, X-1, X-2, P-OH, Ts-5** and **Boc-1** were synthesized according to previous literature. Thin-layer chromatography (TLC) was performed on silica gel HSGF254. Nuclear magnetic resonance (NMR) spectra were recorded on a Bruker AV 400 spectrometer at 400 MHz (1H NMR), 101 MHz (13C NMR) and 376 MHz (19F NMR). High-resolution electrospray ionization-mass spectra (HR-ESI-MS) were recorded on a Bruker Apex IV Fourier transformation mass spectrometer.

Gel permeation chromatography (GPC) in DMF was conducted on a system comprised of a Waters 515 HPLC pump, and a Waters 2414 RI detector equipped with two Agilent mixed columns (one PLgel MIXED-C and one PLgel MIXED-D). DMF with 0.01 M LiBr was used as the eluent at a flow rate of 1.0 mL/min. Polystyrene standards were used for the calibration.

Molecular dynamics (MD) simulations were carried out using GROMACS 2022.2. A cubic simulation box was constructed and filled with DMF solvent molecules, into which a single M1 or M2 molecule was inserted. The system underwent energy minimization, followed by NVT and NPT equilibration at 363.15 K. Subsequently, a 20 ns MD simulation was performed under periodic boundary conditions. For trajectory analysis, the gmx mindist tool was used to compute the minimum distance between the carbonate and crown ether groups over time.

**2. Synthetic Protocols**

**Scheme S1. Synthetic Protocols for I-NH2**

Compound **I-1** and **I-2** were purchased from Aladdin and Macklin, and used directly without further purification.

**I-Boc**: To a stirred solution of compound **I-1** (2.06 g, 10.0 mmol) and compound I-2 (2.37 g, 10.0 mmol) in MeCN (30 mL) was added potassium carbonate (2.76 g, 20.0 mmol). The reaction was carried out at 80 °C overnight. The reaction mixture was then filtered and concentrated to give a residue, which was purified by column chromatography (SiO2, PE : EA = 5:1, v/v) to afford **I-Boc** as a white solid (3.19 g, 88%). **1H NMR (400 MHz, CDCl3)** δ 7.04 (t, *J =* 1.7 Hz, 1H), 6.76 (d, *J =* 1.7 Hz, 2H), 4.86 (s, 1H), 4.04 (t, *J =* 5.9 Hz, 2H), 3.35 (q, *J =* 6.4 Hz, 2H), 1.99 (p, *J =* 6.2 Hz, 2H), 1.45 (s, 9H), 1.32 (s, 18H). **13C NMR (101 MHz, CDCl3)** δ 158.4, 156.2, 152.4, 115.24, 108.9, 65.8, 38.4, 35.1, 31.6, 29.7, 28.6. **ESI HRMS** for **I-Boc**: Calcd for C22H37NO3Na: *m/z* = 386.2671 [*M* + Na]+; found: 386.2672.

**I-NH2**: Compound **I-Boc** (1.82 g, 5.00 mmol) was dissolved in a mixture of DCM (10 mL) and TFA (10 mL). The reaction was stirred at room temperature for 30 minutes and then concentrated under reduced pressure. The residue was dissolved in DCM (10 mL) and washed twice with NaOHaq (40%, w/w, 10 mL). Removal of the solvent afforded **I-NH2** as a colourless solid (1.26g, 96%). **1H NMR (400 MHz, CDCl3)** δ 7.03 (t, *J =* 1.7 Hz, 1H), 6.77 (d, *J =* 1.6 Hz, 2H), 4.07 (t, *J =* 6.1 Hz, 2H), 2.94 (t, *J =* 6.8 Hz, 2H), 2.00–1.90 (m, 2H), 1.68 (s, 2H), 1.32 (s, 18H). **13C NMR (101 MHz, CDCl3)** δ 158.6, 152.3, 115.1, 108.9, 65.7, 39.4, 35.1, 33.2, 31.6. **ESI HRMS** for **I-NH2**: Calcd for C17H30NO: *m/z* = 264.2327 [*M* + H]+; found: 264.2332.

**Scheme S2. Synthetic Protocols for DB-CC**

Compound **6-eo** was purchased from Aladdin, and used directly without further purification.Compound **F** was synthesized according to previous literature S1.

**F-TBS**: A solution of bis(trichloromethyl) carbonate (5.92 g, 20.0 mmol) in THF (50.0 mL) was cooled to 0 °C, and pyridine (3.16 g, 40.0 mmol) was added slowly. A solution of compound **6-eo** (4.48 g, 40.0 mmol) in THF (20.0 mL) was then added dropwise, and the mixture was stirred at 0 °C for 1 h. The reaction mixture was filtered and concentrated to afford a reactive intermediate, which was used directly in the next step. Compound **F** (18.4 g, 50.0 mmol) and TEA (7.57 g, 75.0 mmol) were dissolved in DCM (100 mL), and the resultant reactive intermediate was added. After stirring at room temperature for 0.5 h, the reaction was concentrated and the crude product was purified by column chromatography (SiO2, PE : EA = 10:1, v/v) to give **F-TBS** as a colourless oil (12.1 g, 60%). **1H NMR (400 MHz, CDCl3)** δ 6.97 (s, 1H), 4.24 (t, *J =* 6.6 Hz, 2H), 3.49 (t, *J =* 7.3 Hz, 2H), 2.58 (s, 3H), 2.24 (s, 3H), 2.20 (td, *J =* 6.9, 2.6 Hz, 2H), 2.05 (t, *J =* 7.3 Hz, 2H), 1.93 (t, *J =* 2.6 Hz, 1H), 1.74 (p, *J =* 6.8 Hz, 2H), 1.60–1.45 (m, 10H), 0.82 (s, 9H), -0.04 (s, 6H). **13C NMR (101 MHz, CDCl3)** δ 153.1, 144.3, 141.7, 141.4, 138.0, 133.7, 128.8, 84.1, 69.4, 68.6, 60.4, 45.6, 39.9, 31.0, 28.1, 28.0, 25.9, 25.1, 24.7, 18.3, 18.2, 17.1, -5.4. **ESI HRMS** for **F-TBS**: Calcd for C27H44NO6Si: *m/z* = 506.2938 [*M* + H]+; found: 506.2936.

**F-COOH**: Compound **F-TBS** (10.1 g, 20.0 mmol) was dissolved in methanol (200 mL) and Amberlyst 15 (14.6 g, 80 mmol) was added. The reaction was stirred at room temperature for 1 h. The mixture was filtered and concentrated. The crude product was dissolved in DMF (150 mL), in which Celite 545RV (60.0 g) and pyridinium dichromate (60.0 g, 160 mmol) were added. After stirring at room temperature overnight, 150 mL diethyl ether was added. The mixture was filtered through diatomite and the pH of the filtrate was adjusted to 3 by addition of 1 M HCl aqueous solution. After two washes with water, the filtrate was concentrated and the residue was purified by column chromatography (SiO2, PE : EA = 3:1, v/v) to furnish **F-COOH** as a yellow solid (5.92 g, 73%). **1H NMR (400 MHz, CDCl3)** δ 6.99 (s, 1H), 4.26 (t, *J =* 5.7 Hz, 2H), 2.86 (s, 2H), 2.60 (s, 3H), 2.31–2.17 (m, 5H), 1.95 (t, *J =* 2.6 Hz, 1H), 1.75 (p, *J =* 6.9 Hz, 2H), 1.64–1.47 (m, 11H).**13C NMR (101 MHz, CDCl3)** δ 176.4, 153.4, 144.1, 141.51, 141.46, 137.2, 134.0, 129.5, 84.3, 69.7, 68.6, 39.4, 30.8, 28.13, 28.07, 25.3, 24.8, 18.4, 17.5.**ESI HRMS** for **F-COOH**: Calcd for C21H27NO7Na: *m/z* = 428.1685 [*M* + Na]+; found: 428.1688.

**DB-CC**: To a stirred solution of compound **F-COOH** (4.05 g, 10.0 mmol) in THF (30 mL) were added pentafluorophenol (3.66 g, 20.0 mmol), EDC⸱HCl (5.73 g, 30.0 mmol) and DMAP (366 mg, 3.00 mmol). The reaction was performed at room temperature overnight. The reaction mixture was concentrated and the crude product was purified by column chromatography (SiO2, PE : EA = 10:1, v/v) to afford **DB-CC** as a colourless solid (3.71 g, 65%). **1H NMR (400 MHz, CDCl3)** δ 7.02 (s, 1H), 4.29 (t, *J =* 6.6 Hz, 2H), 3.22 (s, 2H), 2.63 (s, 3H), 2.28 (s, 3H), 2.21 (td, *J =* 6.7, 2.6 Hz, 2H), 1.94 (t, *J =* 2.7 Hz, 1H), 1.77 (p, *J =* 6.8 Hz, 2H), 1.67 (s, 6H), 1.62–1.51 (m, 4H). **13C NMR (101 MHz, CDCl3)** δ 167.1, 153.0, 144.2, 141.6, 141.2, 136.3, 134.1, 129.9, 84.2, 69.8, 68.6, 46.7, 39.7, 30.6, 28.1, 28.0, 25.3, 24.8, 18.4, 17.5. **19F NMR (376 MHz, CDCl3)** δ -152.1 – -152.4 (m, 2F), -158.0 (t, *J =* 21.5 Hz, 1F), -162.2 – -162.5 (m, 2F). **ESI HRMS** for **DB-CC**: Calcd for C27H26NO7NaF5: *m/z* = 594.1527 [*M* + Na]+; found: 594.1529.

**Scheme S3. Synthetic Protocols for** **Stopper-N3**

Compound **X-1** and **X-2** were synthesized according to previous literature S2,S3

To a solution of compound **X-1** (5.26 g, 20.0 mmol) in MeOH (100 mL) was added compound **X-2** (2.28 g, 20.0 mmol). The reaction mixture was heated to reflux for 24 h. After cooling to room temperature, NaBH4 (1.48 g, 40.0 mmol) was added portionwise over 0.5 h in an ice water bath. The mixture was stirred at room temperature for 24 h and then quenched with H2O (1.00 mL). MeOH was removed in vacuo and the residue was diluted with DCM (100 mL). The resulting biphasic mixture was stirred vigorously at room temperature for 30 min. The organic phase was separated and the aqueous phase was extracted with DCM (50.0 mL × 2). The combined organic layers were washed with brine (500 mL), dried over MgSO4 and concentrated in vacuo. Concentrated HCl (4.00 mL) was then added dropwise to the crude residue and the mixture was stirred for 1 h. The reaction mixture was filtered and the solid residue was washed with water (50.0 mL × 3). The residue was dispersed in acetone and heated to 50 °C. Addition of excess saturated aqueous NH4PF6 (5.00 mL) led to dissolution of the desired crude product. The acetone was evaporated, the residue suspended in water was extracted with DCM (100 mL). The organic phase was dried over Na2SO4 and the solvent removed under reduced pressure. The crude product was purified by column chromatography (SiO2, PE : EA = 5:1, v/v) to afford **Stopper-N3** as a white solid (7.10 g, 70%). **1H NMR (400 MHz, CDCl3)** δ 7.71 (t, *J =* 1.8 Hz, 1H), 7.61 (t, *J =* 1.8 Hz, 1H), 6.24 (s, 2H), 4.10 (s, 2H), 3.40 (t, *J =* 5.6 Hz, 2H), 3.28–3.13 (m, 2H), 1.88 (p, *J =* 7.1 Hz, 2H), 1.71 (p, *J =* 6.9 Hz, 2H), 1.43 (d, *J =* 1.5 Hz, 9H), 1.36 (d, *J =* 1.5 Hz, 9H).**13C NMR (101 MHz, CDCl3)** δ 155.2, 148.6, 142.1, 128.2, 127.6, 122.0, 50.7, 49.4, 48.7, 36.3, 35.4, 30.83, 30.77, 25.8, 23.7. **ESI HRMS** for **Stopper-N3**: Calcd for C19H33N5O2F6P: *m/z* = 508.2276 [*M* + H]+; found: 508.2278.

**Scheme S4. Synthetic Protocols for** **Cown-BocNH2**

**P-OH**, **Ts-5** were synthesized according to previous literature S4,S5.

**Crown-ene**: Sodium hydride (1.9 g, 80 mmol) was suspended in THF (1000 ml), and a solution of **P-OH** (3.9 g, 20 mmol) and **Ts-5** (11.8 g, 20 mmol) in THF (50 ml) was added dropwise over 12 h at 70 °C. The reaction was continued for an additional 12 h. The mixture was cooled to room temperature and H2O (5 ml) was added to quench the reaction. The resulting mixture was filtered and the solvent removed by rotary evaporation. The crude product was purified by column chromatography (SiO2, MeOH : DCM = 15:1, v/v) to give **Crown-ene** as a colourless oil (2.7 g, 31%). **1H NMR (400 MHz, CDCl3)** δ 6.93 (s, 2H), 6.03 (m, 1H), 5.42 (d, *J =* 17.3, 1H), 5.31 (d, *J =* 17.3 Hz, 1H), 4.67–4.58 (m, 6H), 3.75–3.54 (m, 24H).**13C NMR (101 MHz, CDCl3)** δ 166.0, 159.8, 132.3, 118.2, 107.0, 73.9, 70.8, 70.62, 70.59, 70.0, 68.5. **ESI HRMS** for **P-ene**: Calcd for C22H36NO8: *m/z* = 442.2441 [*M* + H]+; found: 442.2444.

**Crown-BocNH2**: Palladium (64 mg, 0.6 mmol), ammonium formate (3.8 g, 60 mmol) and **Crown-ene** (2.6 g, 6 mmol) were combined in MeOH (20 ml) and the mixture was stirred at 70 °C for 12 h. After cooling to room temperature, the solvent was removed under reduced pressure. The residue was dissolved in DCM (20 ml), filtered, and the filtrate concentrated under reduced pressure. The crude product was dissolved in MeCN (20 ml), then tert-Butyl 3-bromopropylcarbamate (2.9 g, 12 mmol) and potassium carbonate (1.7 g, 12 mmol) were added. The mixture was stirred at 80 °C for 12 h and then cooled to room temperature. The mixture was filtered and the filtrate concentrated under reduced pressure. Purification by column chromatography (SiO2, MeOH : DCM = 10:1, v/v) afforded **Crown-BocNH2** as a colourless oil (2.5 g, 73%). **1H NMR (400 MHz, CDCl3)** δ 6.89 (s, 2H), 5.02 (s, 1H), 4.60 (s, 4H), 4.08 (t, *J =* 6.0 Hz, 2H), 3.70–3.51 (m, 24H), 3.28 (q, *J =* 6.5 Hz, 2H), 1.96 (p, *J =* 6.5 Hz, 2H), 1.40 (s, 9H).**13C NMR (101 MHz, CDCl3)** δ 106.8, 73.8, 70.64, 70.61, 70.5, 69.9, 65.5, 37.5, 29.3, 28.4. **ESI HRMS** for **Crown-BocNH2**: Calcd for C27H47NO10: *m/z* = 559.3231 [*M* + H]+; found: 559.3231.

**Scheme S5. Synthetic Protocols for MIM-1 and MIM-2**

Compound **24-Crown-8** was purchased from Aladdin, Compound **Boc-1** were synthesized according to previous literatureS6

**Rox-1**: Compound **Stopper-N3** (1.01 g, 2.00 mmol), compound **Crown-BocNH2** (1.40 g, 2.50 mmol), compound **DB-CC** (1.14 g, 2.00 mmol) and Cu(MeCN)4PF6 (74.4 mg, 0.200 mmol) were dissolved in DCM (20 ml) and the mixture was stirred under N2 at room temperature for 12 h. The solvent was removed and the crude product was purified by column chromatography (SiO2, THF : DCM = 5:1, v/v) to yield **Rox-1** as a white solid (2.49 g, 76%). **1H NMR (400 MHz, CDCl3)** δ 8.42 (s, 2H), 7.70 (d, *J =* 1.9 Hz, 1H), 7.62–7.47 (m, 2H), 7.02 (s, 1H), 6.72 (s, 2H), 4.94 (t, *J =* 6.2 Hz, 1H), 4.42–4.35 (m, 4H), 4.27 (t, *J =* 6.5 Hz, 2H), 4.18–4.01 (m, 4H), 3.75–3.42 (m, 24H), 3.33–3.17 (m, 6H), 2.71–2.60 (m, 5H), 2.27 (s, 3H), 1.98 (p, *J =* 6.4 Hz, 2H), 1.88 (p, *J =* 7.9 Hz, 2H), 1.66 (m, 14H), 1.47–1.35 (m, 21H), 1.08 (s, 9H).**13C NMR (101 MHz, CDCl3)** δ 167.1, 166.5, 158.0, 156.1, 153.0, 152.8, 147.9, 144.0, 141.4, 141.2, 140.7, 136.2, 134.0, 129.6, 126.5, 125.8, 124.7, 109.0, 73.8, 70.9, 70.8, 70.7, 70.5, 70.4, 70.3, 69.8, 66.3, 49.2, 48.7, 47.5, 46.6, 39.6, 39.5, 36.1, 35.2, 31.1, 30.9, 30.8, 30.7, 30.5, 29.3, 29.0, 28.4, 28.2, 27.3, 25.4, 25.14, 25.10, 23.0, 17.4. **ESI HRMS** for **Rox-1**: Calcd for C73H105N8O19F11P: *m/z* = 1637.7058 [*M* + H]+; found: 1637.7057.

**Rox-2**: Compound **Rox-1** (2.00 g, 1.22 mmol), acetic anhydride (1.24 g, 12.2 mmol) and triethylamine (2.46 g, 24.4 mmol) were dissolved in DCM (20 ml) and stirred at room temperature for 12 h. The solvent was removed and the crude product was purified by column chromatography (SiO2, THF : DCM = 2:1, v/v) to afford **Rox-2** as a white solid (1.59 g, 85%). **1H NMR (400 MHz, CDCl3)** δ 7.64 (d, *J =* 44.0 Hz, 1H), 7.40 (dd, *J =* 30.9, 1.9 Hz, 1H), 7.03 – 6.91 (m, 2H), 6.81 (s, 2H), 6.34 (d, *J =* 47.4 Hz, 1H), 4.47 (s, 4H), 4.36 (d, *J =* 11.0 Hz, 2H), 4.21 (t, *J =* 6.8 Hz, 2H), 4.15–4.00 (m, 4H), 3.56–3.16 (m, 31H), 2.66–2.56 (m, 5H), 2.21 (s, 3H), 2.18 (s, 2H), 1.96–1.88 (m, 3H), 1.76 – 1.56 (m, 14H), 1.37–1.23 (m, 30H).**13C NMR (101 MHz, CDCl3)** δ 171.3, 171.1, 167.0, 156.5, 153.1, 152.8, 152.2, 147.6, 146.2, 144.0, 141.4, 141.07, 141.05, 140.0, 136.1, 134.0, 129.6, 129.3, 124.2, 123.7, 121.9, 121.1, 78.5, 71.1, 71.02, 70.95, 70.92, 70.87, 70.8, 70.5, 70.4, 70.2, 70.0, 69.81, 69.7, 49.4, 48.9, 47.6, 46.5, 44.2, 39.5, 36.7, 36.0, 35.9, 35.1, 34.9, 31.1, 30.90, 30.86, 30.5, 29.6, 29.1, 29.0, 28.8, 28.5, 28.4, 28.3, 26.1, 25.9, 25.5, 25.11, 25.06, 24.99, 24.96, 24.3, 21.5, 21.2, 17.3. **ESI HRMS** for **Rox-2**: Calcd for C75H106N8O20F5: *m/z* = 1533.7444 [*M* + H]+; found: 1533.7430.

**MIM-1**: Compound **Rox-2** (1.53 g, 1.00 mmol) was dissolved in a mixture of DCM (10 mL) and TFA (10 mL). The reaction was stirred at room temperature for 30 minutes and then concentrated. The residue was dissolved in DCM (20 mL) and this solution was added dropwise over 3 h by syringe pump to a large volume of DCM (1000 mL) containing TEA (5.05 g, 50 mmol) at room temperature. The solvent was removed and the residue was purified by column chromatography (SiO2, THF : DCM = 2:1, v/v) to give **MIM-1** as a white solid (873 mg, 70%). **1H NMR (400 MHz, DMSO-*d6*, 353K)** δ 7.58 (s, 1H), 7.53 (s, 1H), 7.29 (s, 1H), 7.17 (s, 1H), 7.09 (s, 1H), 6.83 (s, 2H), 4.48 – 4.41 (m, 4H), 4.31 (d, *J =* 10.9 Hz, 2H), 4.17 (s, 2H), 4.05 – 3.95 (m, 4H), 3.64 – 3.58 (m, 2H), 3.58 – 3.53 (m, 2H), 3.52 – 3.33 (m, 24H), 3.17 (q, *J =* 6.3 Hz, 2H), 2.61 (d, *J =* 4.9 Hz, 6H), 2.55 (t, *J =* 7.7 Hz, 2H), 2.23 (s, 3H), 1.84 (p, *J =* 6.5 Hz, 2H), 1.68 – 1.55 (m, 8H), 1.52 (s, 6H), 1.37 (s, 11H), 1.32 (s, 9H).**13C NMR (101 MHz, DMSO-*d6*, 298K)** δ 170.2, 169.7, 158.0, 152.2, 152.1, 146.9, 146.0, 143.5, 141.9, 140.3, 139.6, 138.2, 133.4, 129.1, 128.0, 123.8, 121.4, 120.8, 109.0, 74.0, 70.5, 70.41, 70.36, 70.3, 70.1, 69.9, 69.7, 69.6, 69.4, 65.5, 48.6, 48.5, 47.4, 43.9, 35.7, 35.6, 35.0, 34.8, 34.7, 30.71, 30.67, 30.49, 30.46, 30.1, 28.5, 28.4, 27.6, 26.0, 25.03, 24.97, 24.8, 24.7, 21.0, 16.5. **ESI HRMS** for **MIM-1**: Calcd for C75H106N8O20F5: *m/z* = 1533.7444 [*M* + H]+; found: 1533.7430.

**Rox-3**: Compound **Stopper-N3** (1.52 g, 3.00 mmol), compound 24-crown-8 (1.41 g, 4.00 mmol), compound **DB-CC** (1.71 g, 2.00 mmol) and Cu(MeCN)4PF6 (112 mg, 0.300 mmol) were dissolved in DCM (25 ml) and stirred under N2 at room temperature for 12 h. The solvent was removed and the crude product was purified by column chromatography (SiO2, THF : DCM = 5:1, v/v) to furnish **Rox-3** as a white solid (3.21 g, 75%). **1H NMR (400 MHz, CDCl3)** δ 7.65 (s, 1H), 7.56 (s, 2H), 7.17 (s, 2H), 6.98 (s, 1H), 4.43 (t, *J =* 6.6 Hz, 2H), 4.39–4.32 (m, 2H), 4.23 (t, *J =* 6.5 Hz, 2H), 3.54–3.40 (m, 32H), 3.29–3.17 (m, 4H), 2.67 (t, *J =* 7.7 Hz, 2H), 2.59 (s, 3H), 2.22 (s, 3H), 1.95 (p, *J =* 8.0 Hz, 2H), 1.77–1.59 (m, 13H), 1.48–1.40 (m, 2H), 1.34 (s, 10H), 1.29 (s, 10H).**13C NMR (101 MHz, CDCl3)** δ 167.2, 153.2, 152.9, 141.5, 141.3, 140.9, 136.3, 134.1, 126.7, 126.4, 77.6, 77.5, 77.3, 77.2, 76.9, 76.8, 70.5, 69.9, 49.2, 47.9, 46.7, 39.6, 36.2, 35.4, 31.1, 30.8, 30.6, 28.3, 27.2, 25.2, 23.0, 17.4.**ESI HRMS** for **Rox-3**: Calcd for C62H90N6O17F11PNa: *m/z* = 1453.5822 [*M* + Na]+; found: 1453.5808.

**Rox-4**: Compound **Rox-3** (3.00 g, 2.10 mmol), compound **Boc-1** (7.56 g, 21.0 mmol) and triethylamine (4.24 g, 42.0 mmol) were dissolved in DCM (50 ml) and stirred at room temperature for 12 h. The solvent was removed and the residue was purified by column chromatography (SiO2, THF : DCM = 2:1, v/v) to afford **Rox-4** as a white solid (2.38 g, 78%). **1H NMR (400 MHz, CDCl3)** δ 7.73 (s, 1H), 7.43 (d, *J =* 17.2 Hz, 1H), 6.98 (d, *J =* 8.5 Hz, 2H), 5.61 (d, *J =* 6.1 Hz, 1H), 4.60–4.41 (m, 4H), 4.24 (t, *J =* 6.7 Hz, 2H), 3.45 (s, 36H), 3.19 (s, 2H), 2.81 (t, *J =* 5.8 Hz, 2H), 2.69 (t, *J =* 7.6 Hz, 2H), 2.61 (s, 3H), 2.25 (s, 3H), 2.10–1.99 (m, 2H), 1.93–1.83 (m, 2H), 1.80–1.63 (m, 10H), 1.45–1.34 (m, 20H), 1.27 (s, 9H).**13C NMR (101 MHz, CDCl3)** δ 172.8, 167.0, 156.0, 152.9, 152.3, 147.6, 146.3, 144.0, 141.4, 141.1, 140.1, 136.1, 134.0, 129.3, 123.9, 121.6, 78.5, 71.1, 70.9, 69.7, 50.0, 48.2, 46.5, 44.4, 39.5, 36.6, 35.9, 35.0, 33.2, 31.1, 30.92, 30.87, 30.5, 29.0, 28.43, 28.38, 28.3, 26.4, 25.5, 25.3, 25.2, 25.0, 17.4.**ESI HRMS** for **Rox-4**: Calcd for C70H10N7O20F5: *m/z* = 1456.7178 [*M* + H]+; found: 1456.7169.

**MIM-2**: Compound **Rox-4** (2.18 g, 1.50 mmol) was dissolved in a mixture of DCM (15 mL) and TFA (15 mL). The reaction was stirred at room temperature for 30 minutes and then concentrated. The residue was dissolved in DCM (30 mL), and this solution was added dropwise over 3 h by syringe pump to a large volume of DCM (1500 mL) containing TEA (5.05 g, 50 mmol) at room temperature. The solvent was removed and the residue was purified by column chromatography (SiO2, THF : DCM = 2:1, v/v) to yield **MIM-2** as a white solid (1.12 g, 65%). **1H NMR (400 MHz, DMSO-*d6*, 353K)** δ 7.79 (s, 1H), 7.50 (s, 1H), 7.36 (s, 1H), 7.16 (s, 1H), 6.98 (d, *J =* 2.0 Hz, 1H), 4.47–4.37 (m, 4H), 4.21 (t, *J =* 6.0 Hz, 2H), 3.47–3.38 (m, 34H), 3.29–3.23 (m, 2H), 2.75 (t, *J =* 6.7 Hz, 2H), 2.69 (t, *J =* 6.3 Hz, 2H), 2.62 (s, 2H), 2.58 (s, 3H), 2.23 (s, 3H), 2.09–2.03 (m, 2H), 1.86–1.76 (m, 2H), 1.72–1.63 (m, 4H), 1.50–1.41 (m, 8H), 1.37 (s, 9H), 1.30 (s, 9H).**13C NMR (101 MHz, DMSO-*d6*, 298K)** δ 171.3, 169.6, 152.4, 152.1, 147.1, 145.4, 143.3, 141.8, 140.4, 139.6, 138.2, 133.5, 129.0, 128.1, 123.7, 122.6, 121.4, 70.2, 70.1, 70.0, 49.4, 46.9, 42.6, 35.6, 34.8, 34.7, 32.4, 30.7, 30.5, 30.1, 29.0, 28.8, 26.0, 25.7, 25.2, 25.1, 24.9, 16.6. **ESI HRMS** for **MIM-2**: Calcd for C59H94N7O17: *m/z* = 1172.6706 [*M* + H]+; found: 1172.6694.

**3. NMR Spectroscopy**

**
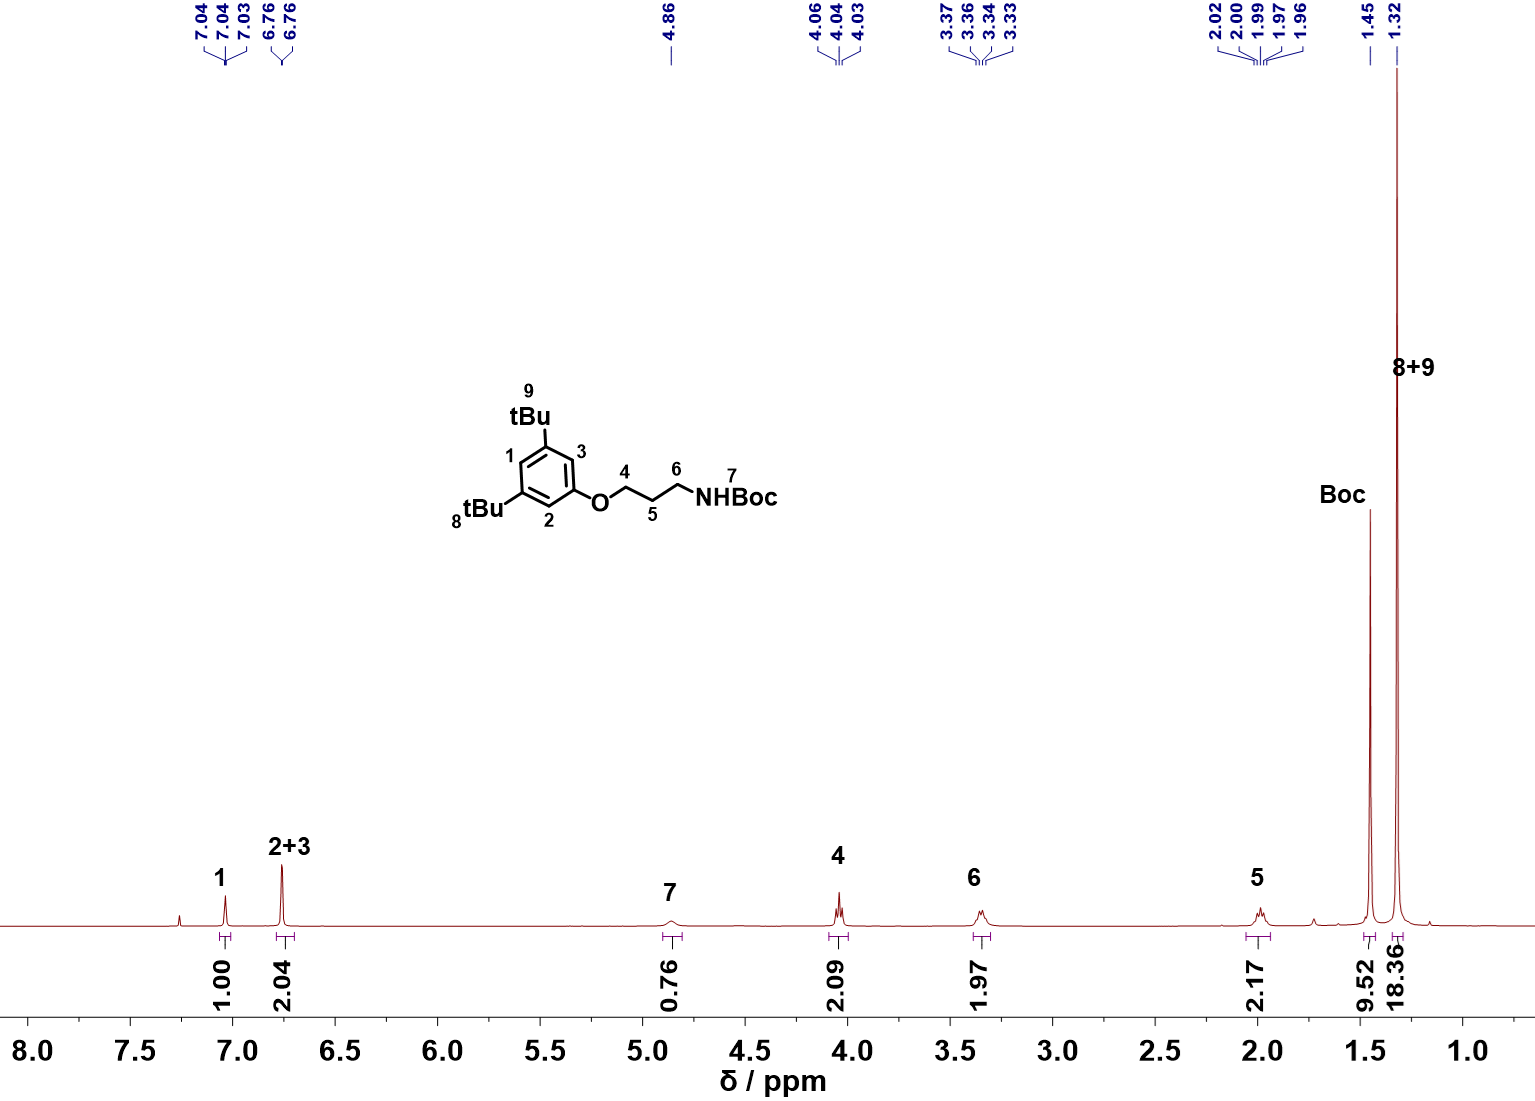
**

**Figure S1**. 1H NMR Spectrum (400 MHz, CDCl3, 298 K) of **I-Boc**.

**
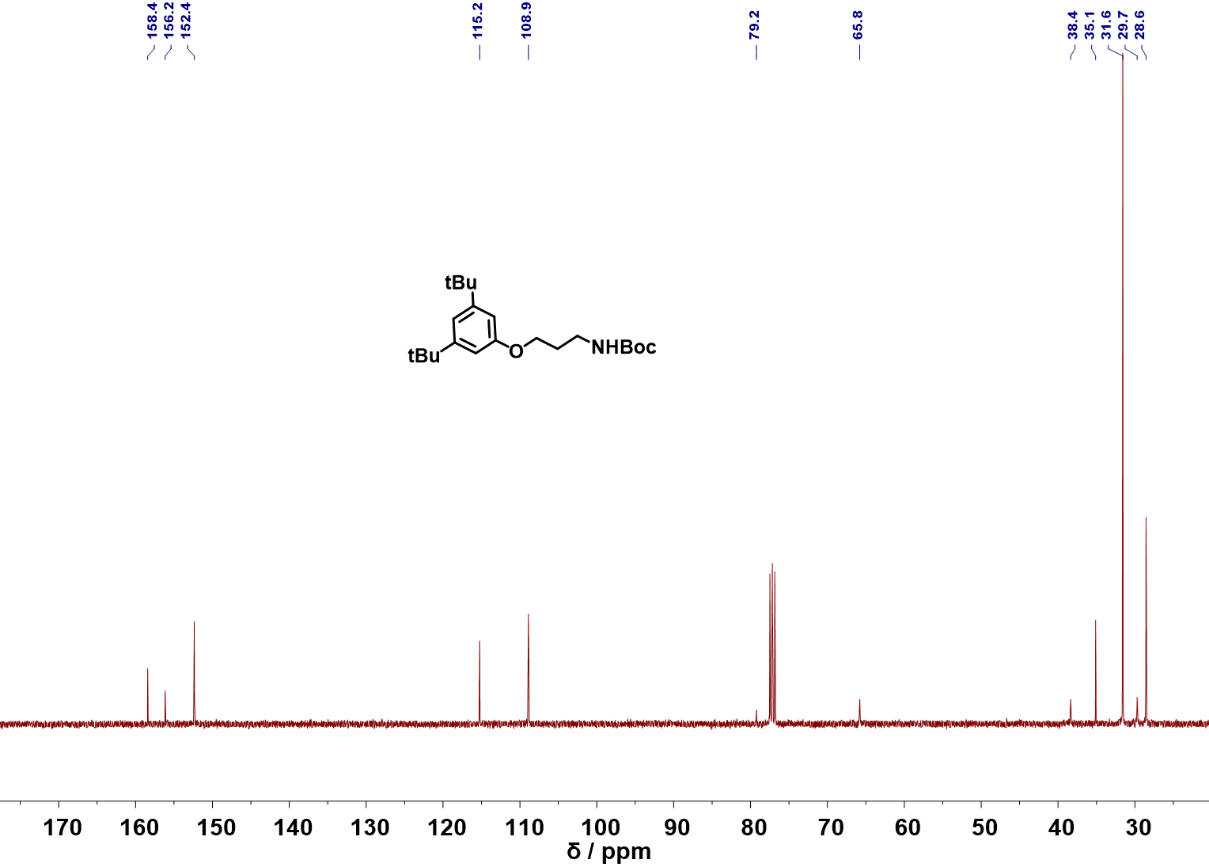
**

**Figure S2**. 13C NMR Spectrum (101 MHz, CDCl3, 298 K) of **I-Boc**.


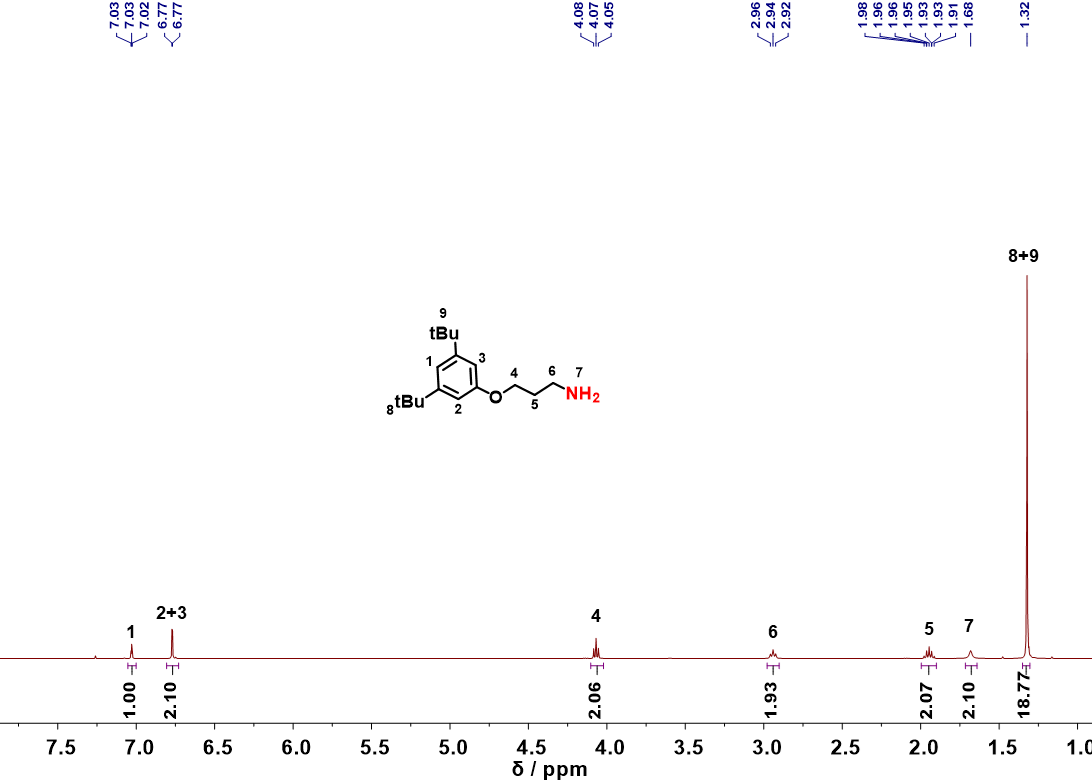


**Figure S3**. 1H NMR Spectrum (400 MHz, CDCl3, 298 K) of **I-NH2**.


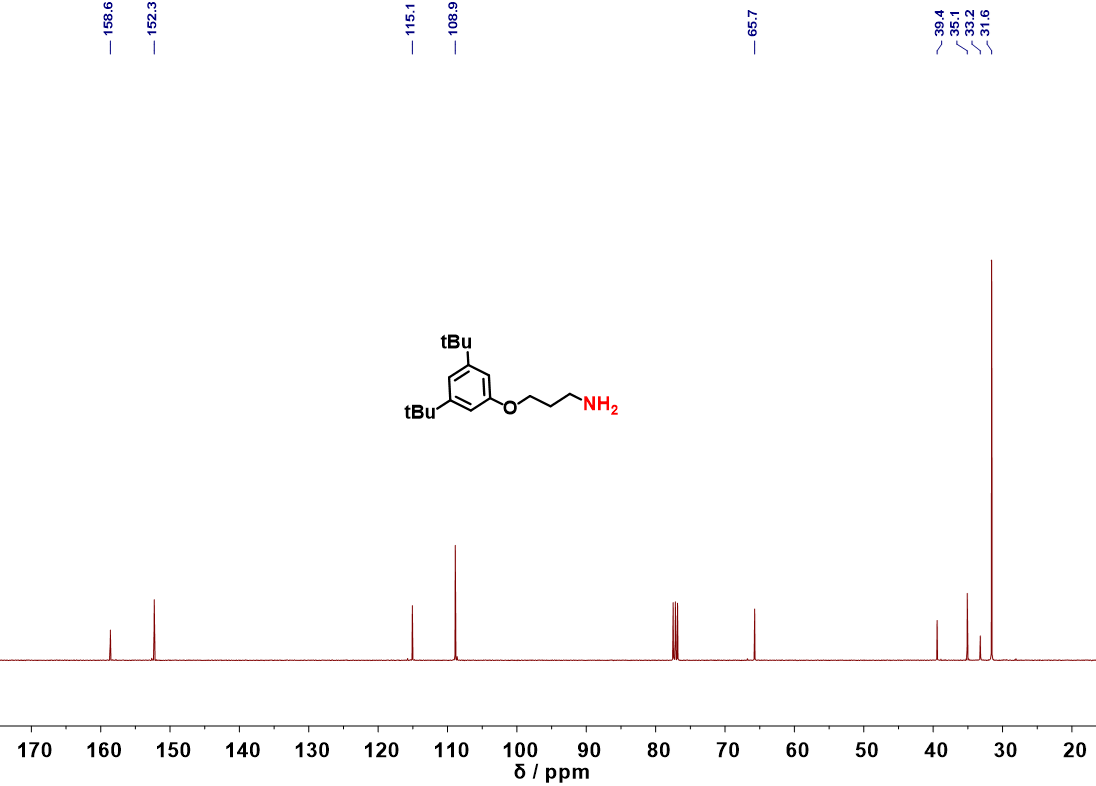


**Figure S4**. 13C NMR Spectrum (101 MHz, CDCl3, 298 K) of **I-NH2**.

**
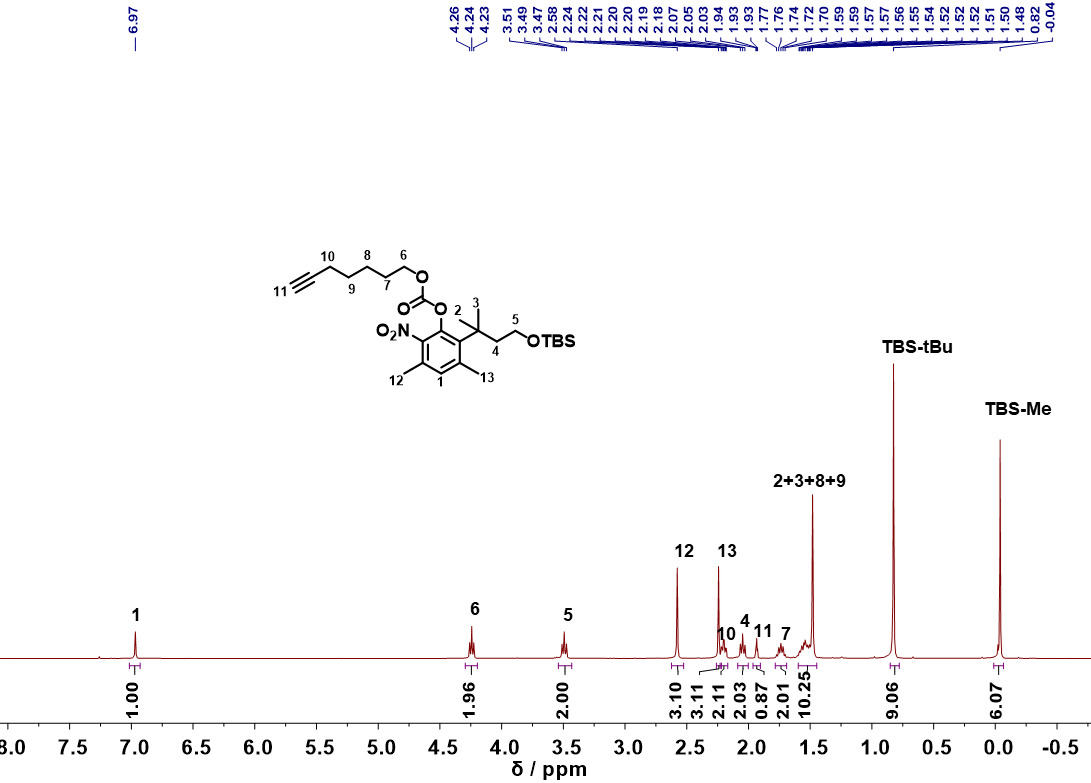
**

**Figure S5**. 1H NMR Spectrum (400 MHz, CDCl3, 298 K) of **F-TBS**.

**
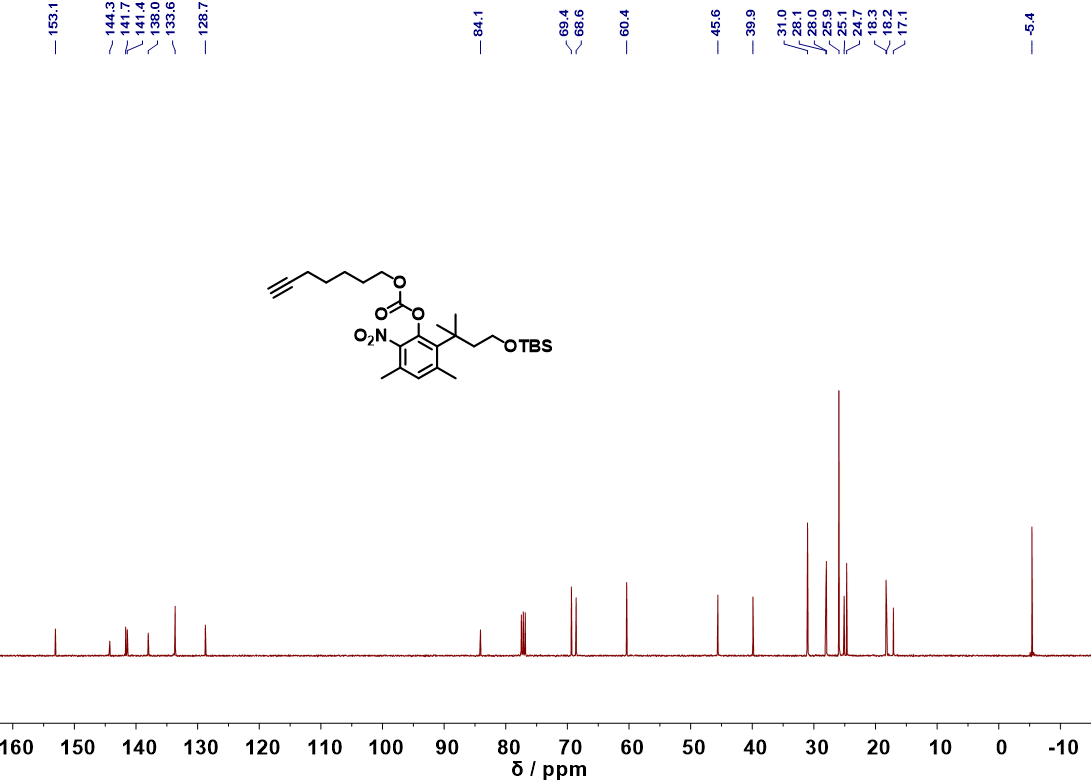
**

**Figure S6**. 13C NMR Spectrum (101 MHz, CDCl3, 298 K) of **F-TBS**.

**
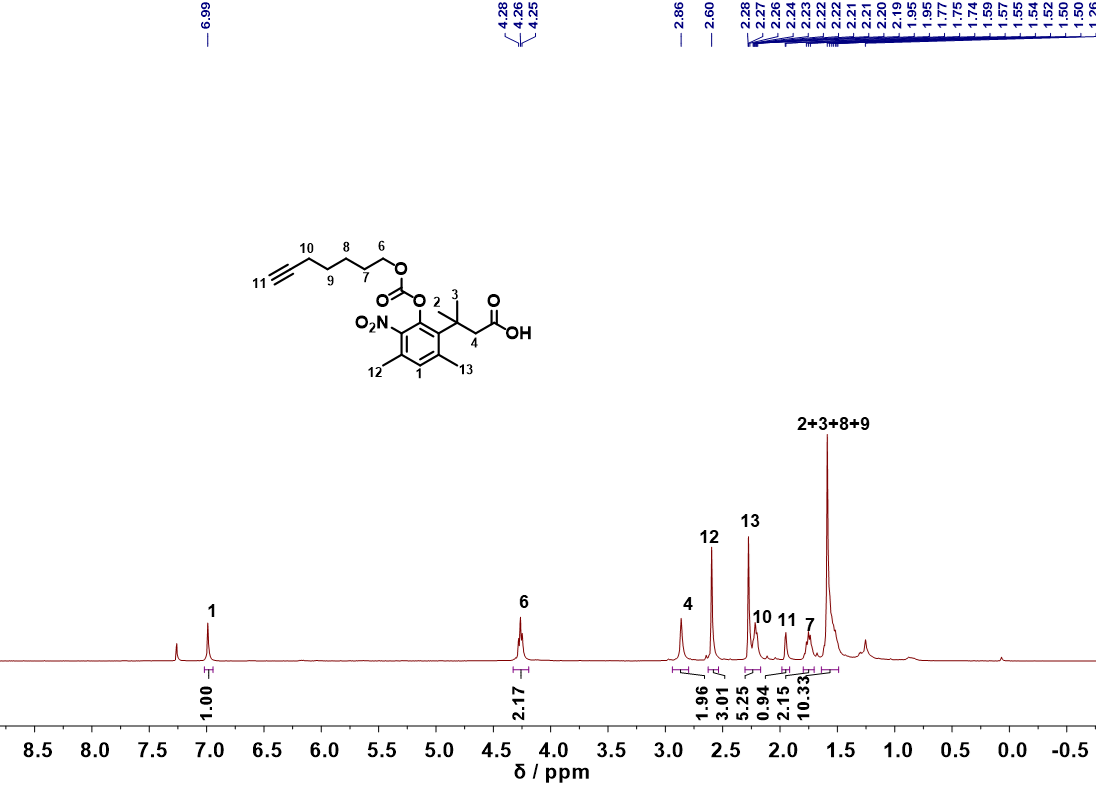
**

**Figure S7**. 1H NMR Spectrum (400 MHz, CDCl3, 298 K) of **F-COOH**.

**
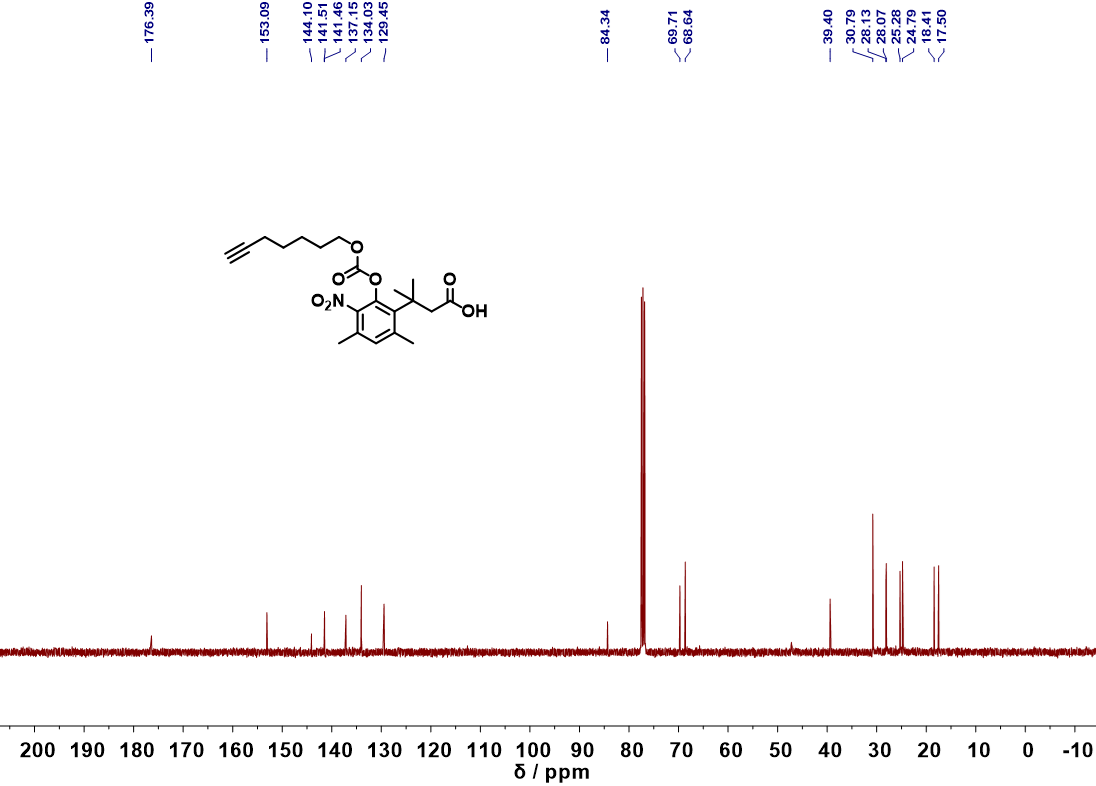
**

**Figure S8**. 13C NMR Spectrum (101 MHz, CDCl3, 298 K) of **F-COOH**.

**
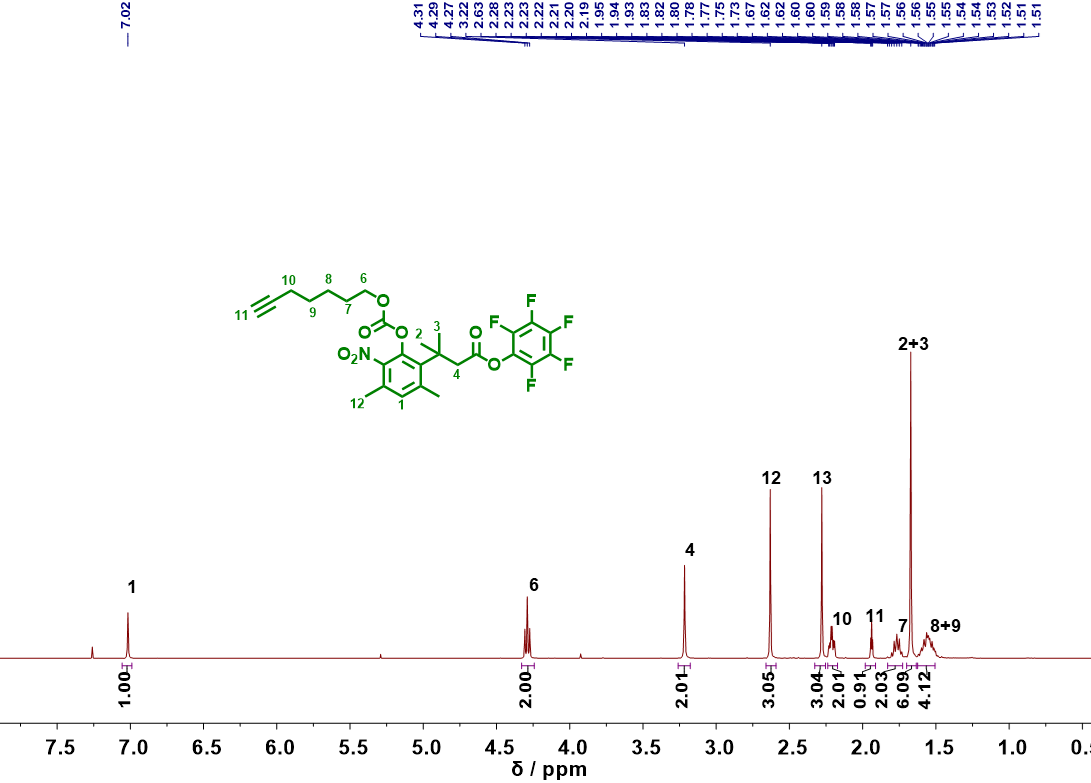
**

**Figure S9**. 1H NMR Spectrum (400 MHz, CDCl3, 298 K) of **DB-CC**.

**
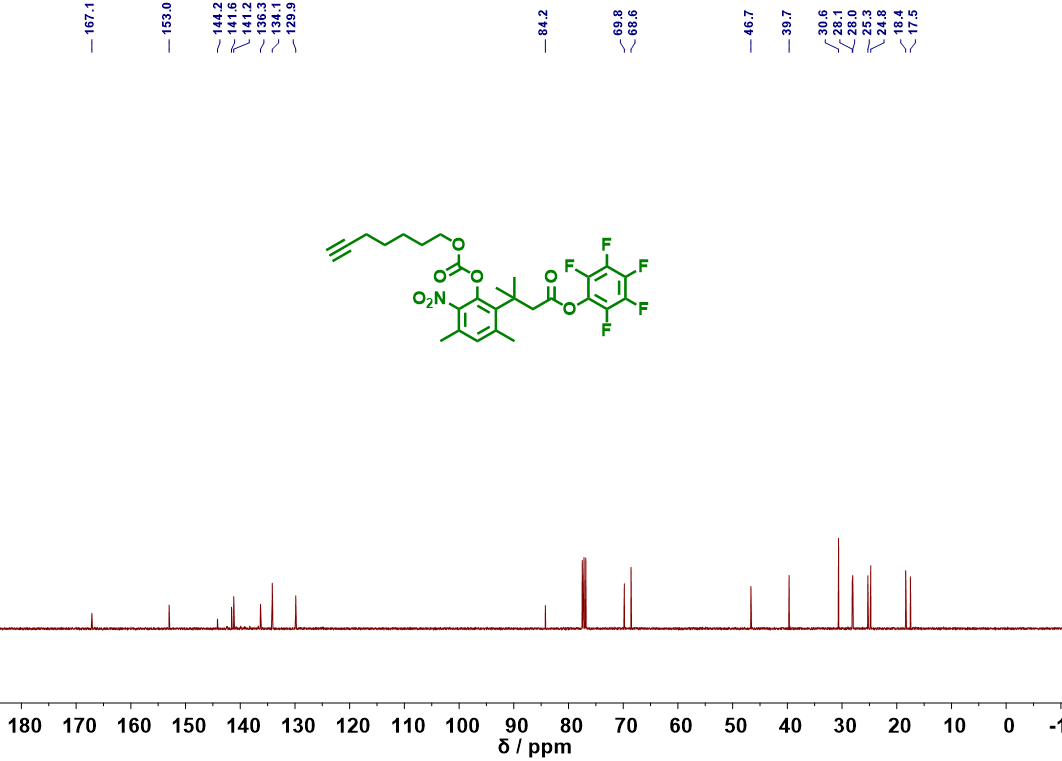
**

**Figure S10**. 13C NMR Spectrum (101 MHz, CDCl3, 298 K) of **DB-CC**.

**
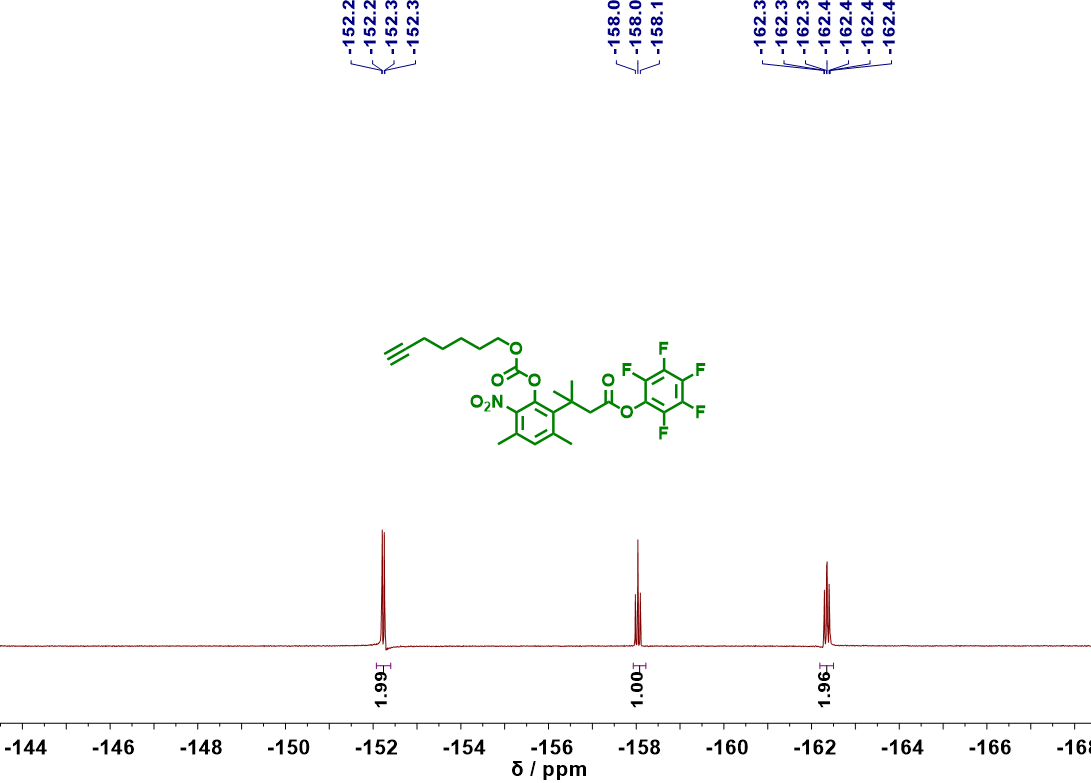
**

**Figure S11**. 19F NMR Spectrum (376 MHz, CDCl3, 298 K) of **DB-CC**.


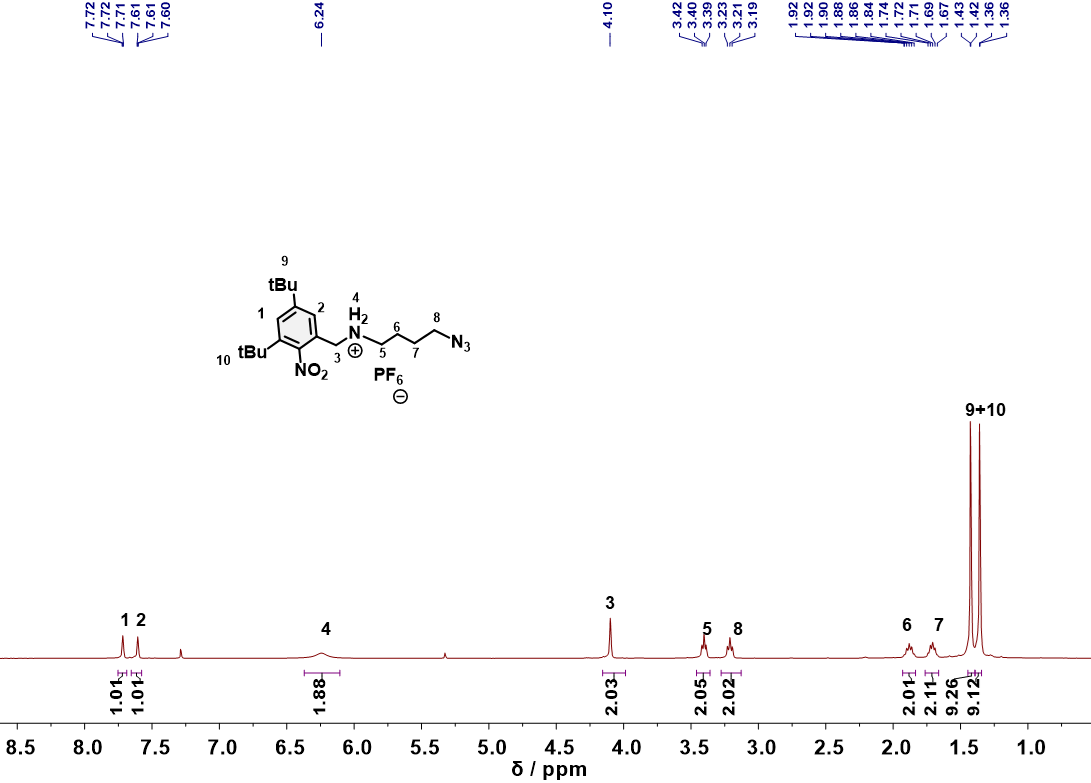


**Figure S12**. 1H NMR Spectrum (400 MHz, CDCl3, 298 K) of **Stopper-N3**.


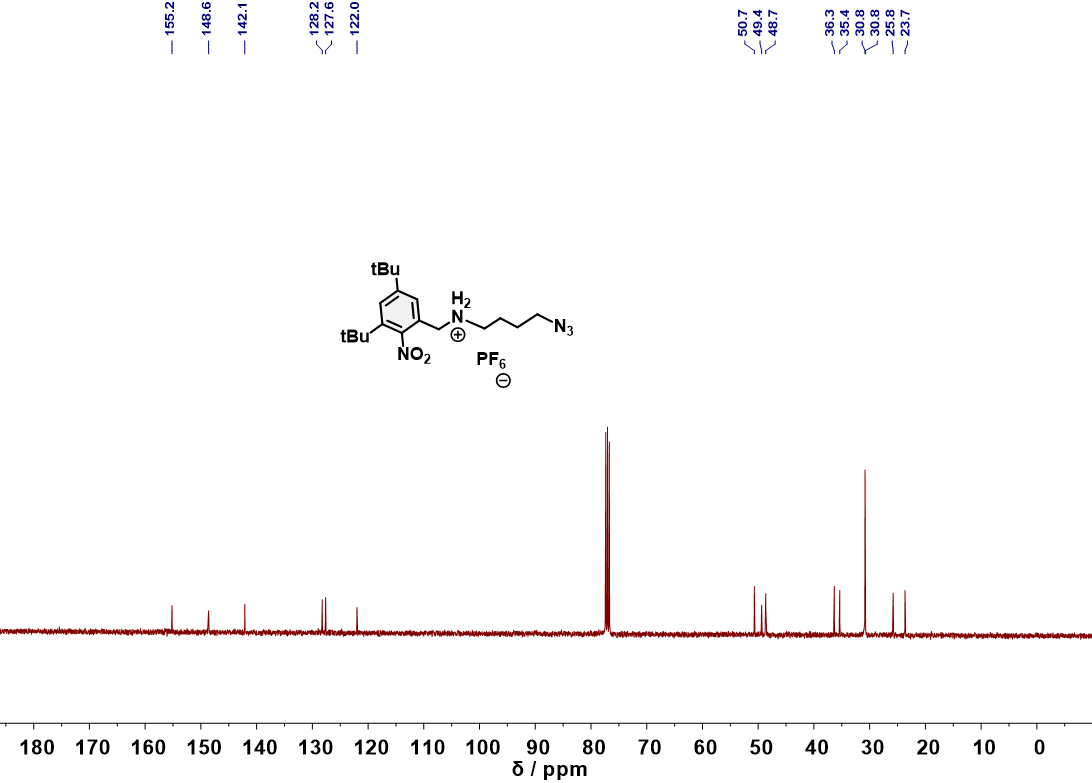


**Figure S13**. 13C NMR Spectrum (101 MHz, CDCl3, 298 K) of **Stopper-N3**.


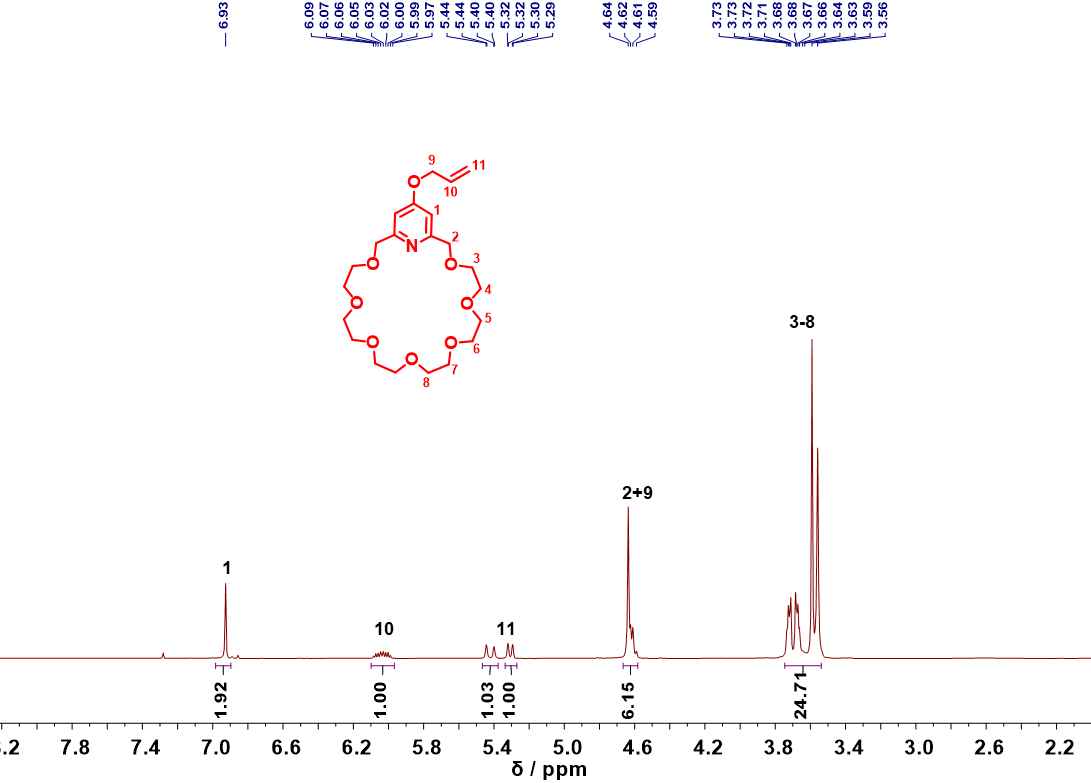


**Figure S14**. 1H NMR Spectrum (400 MHz, CDCl3, 298 K) of **Crown-ene**.


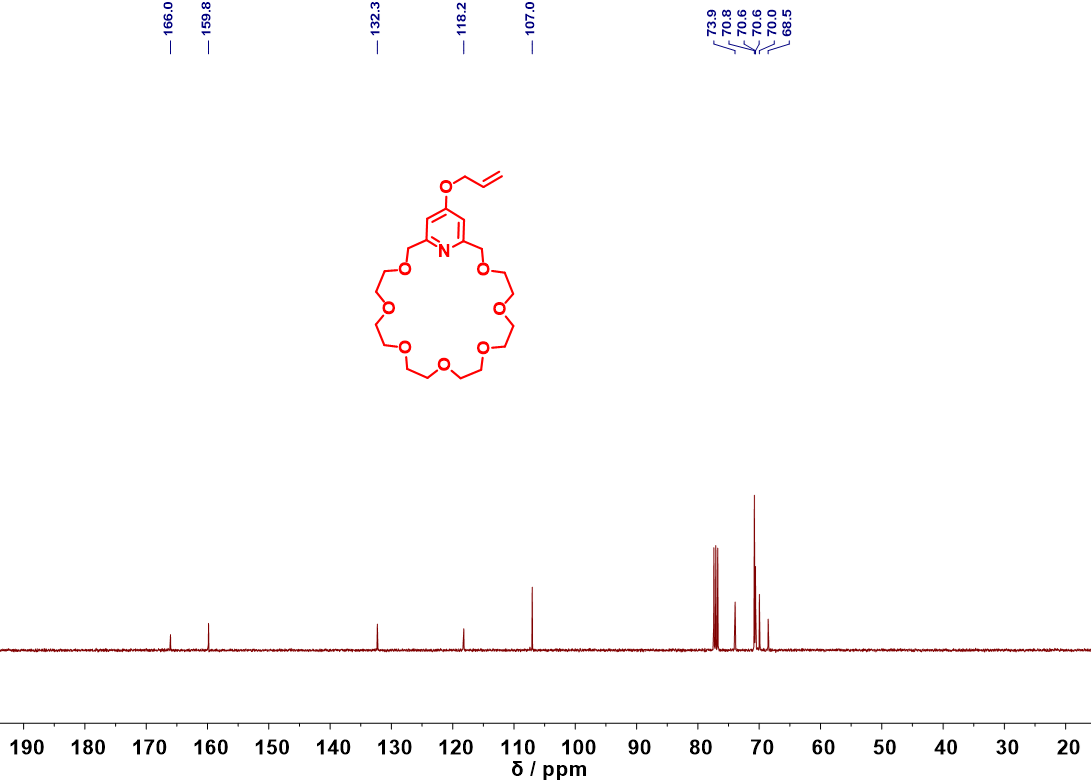


**Figure S15**. 13C NMR Spectrum (101 MHz, CDCl3, 298 K) of **Crown-ene**.


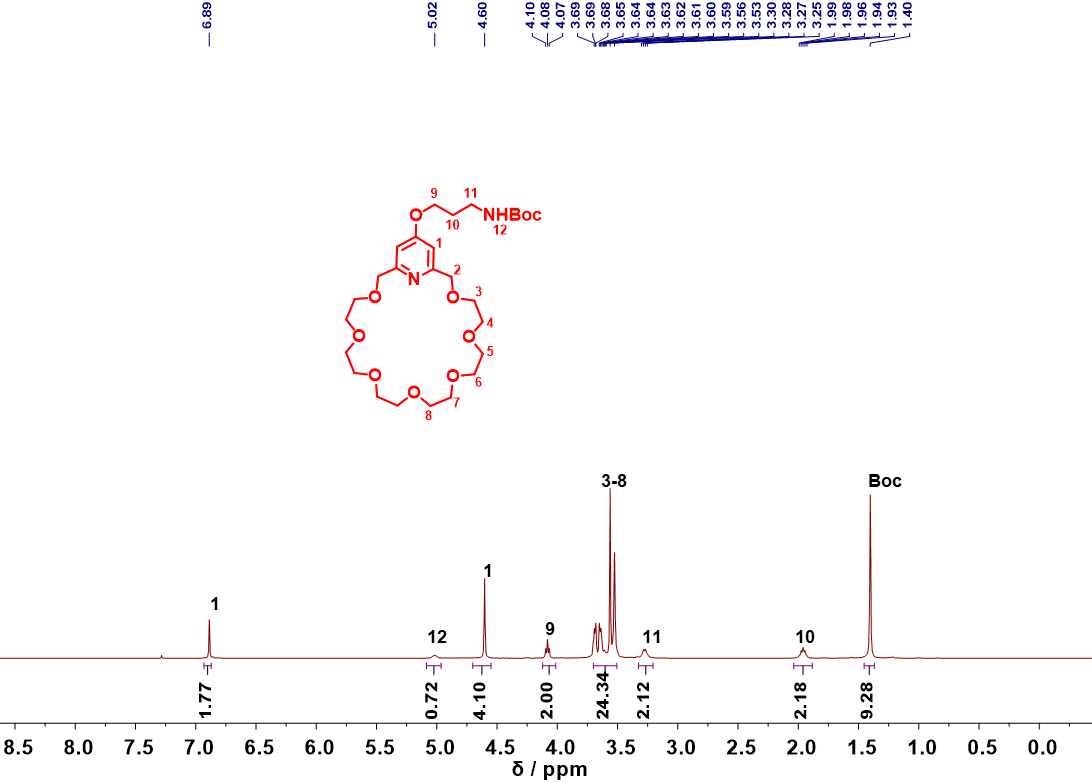


**Figure S16**. 1H NMR Spectrum (400 MHz, CDCl3, 298 K) of **Crown-BocNH2**.


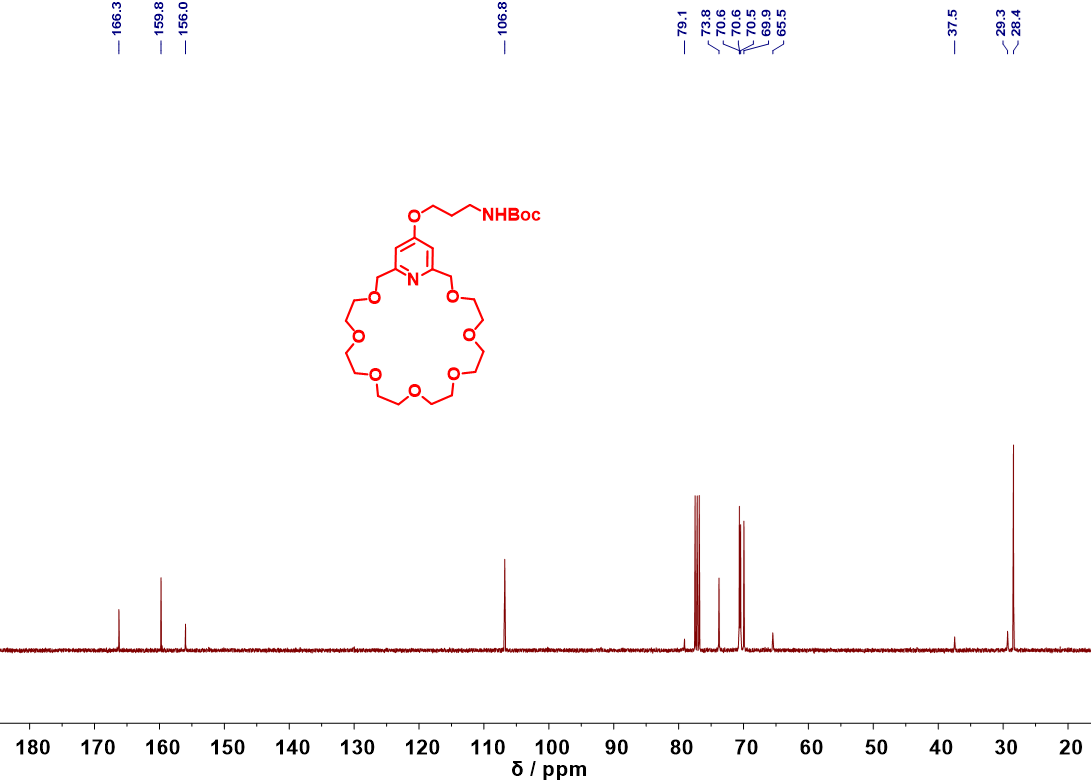


**Figure S17**. 13C NMR Spectrum (101 MHz, CDCl3, 298 K) of **Crown-BocNH2**.

**
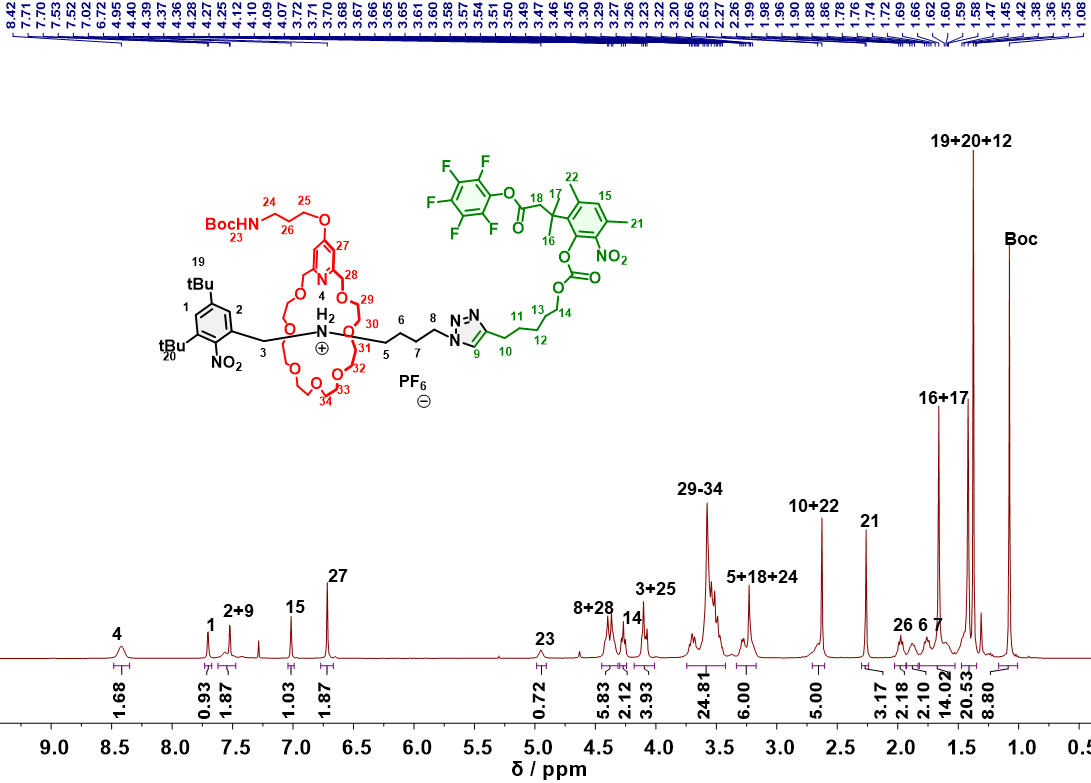
**

**Figure S18**. 1H NMR Spectrum (400 MHz, CDCl3, 298 K) of **Rox-1**.


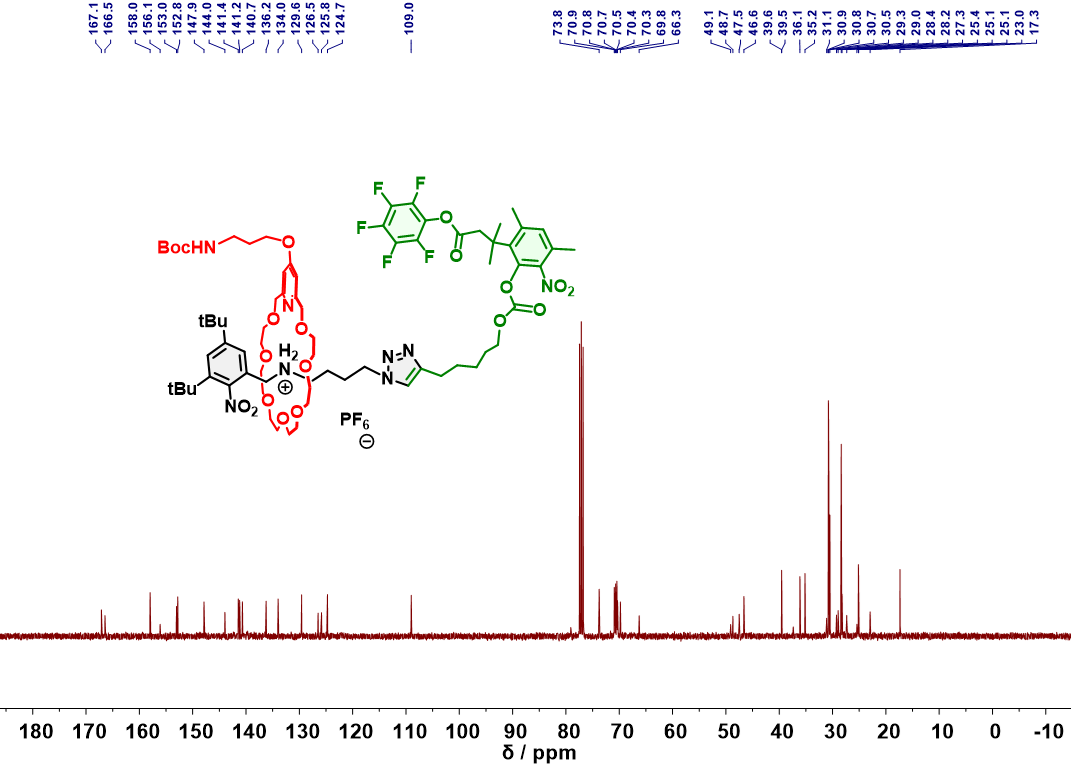


**Figure S19**. 13C NMR Spectrum (101 MHz, CDCl3, 298 K) of **Rox-1**.

**
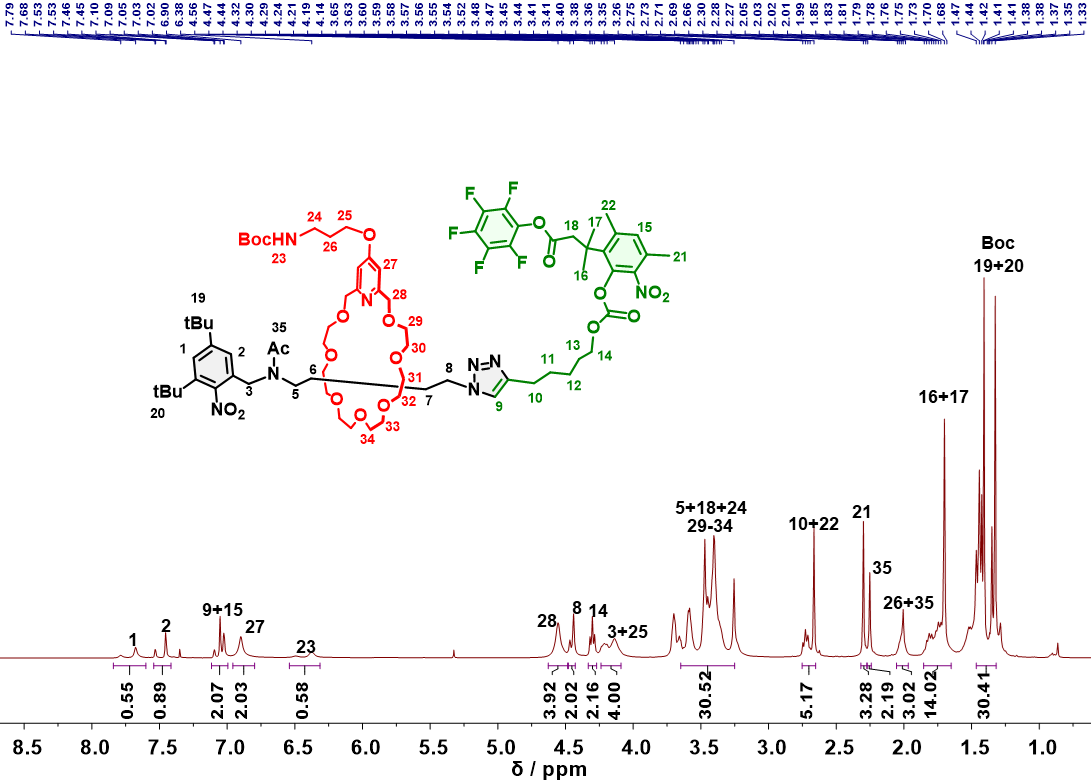
**

**Figure S20**. 1H NMR Spectrum (400 MHz, CDCl3, 298 K) of **Rox-2**.


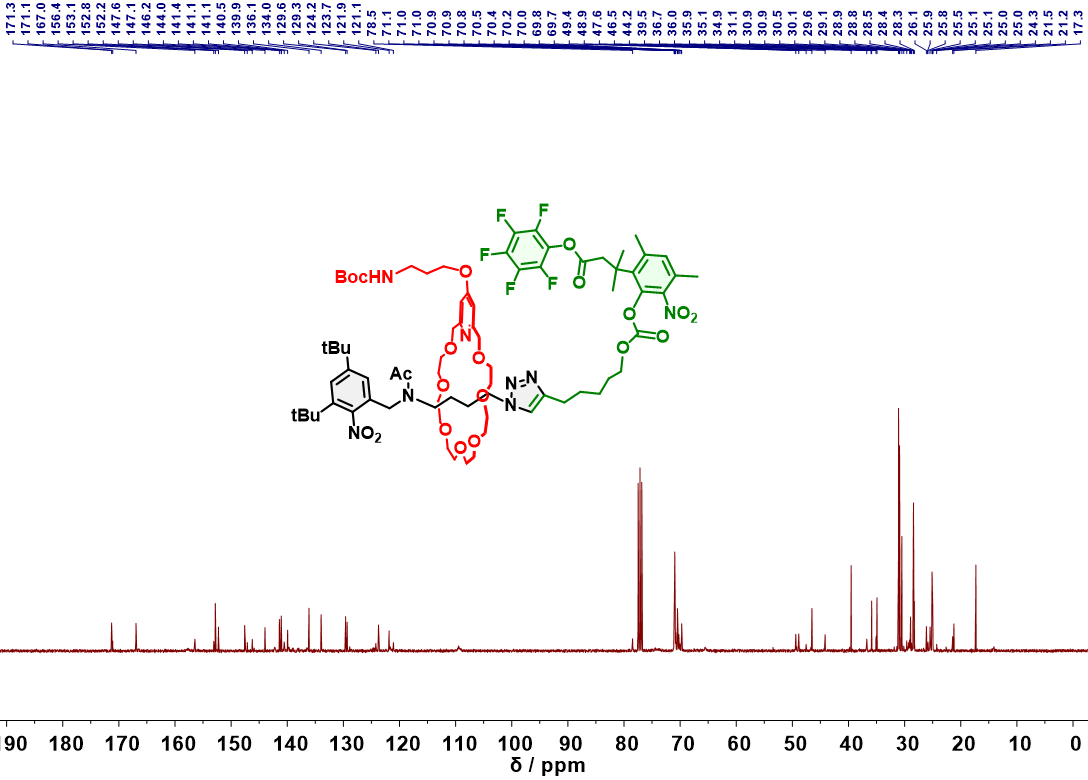


**Figure S21**. 13C NMR Spectrum (101 MHz, CDCl3, 298 K) of **Rox-2**.

**
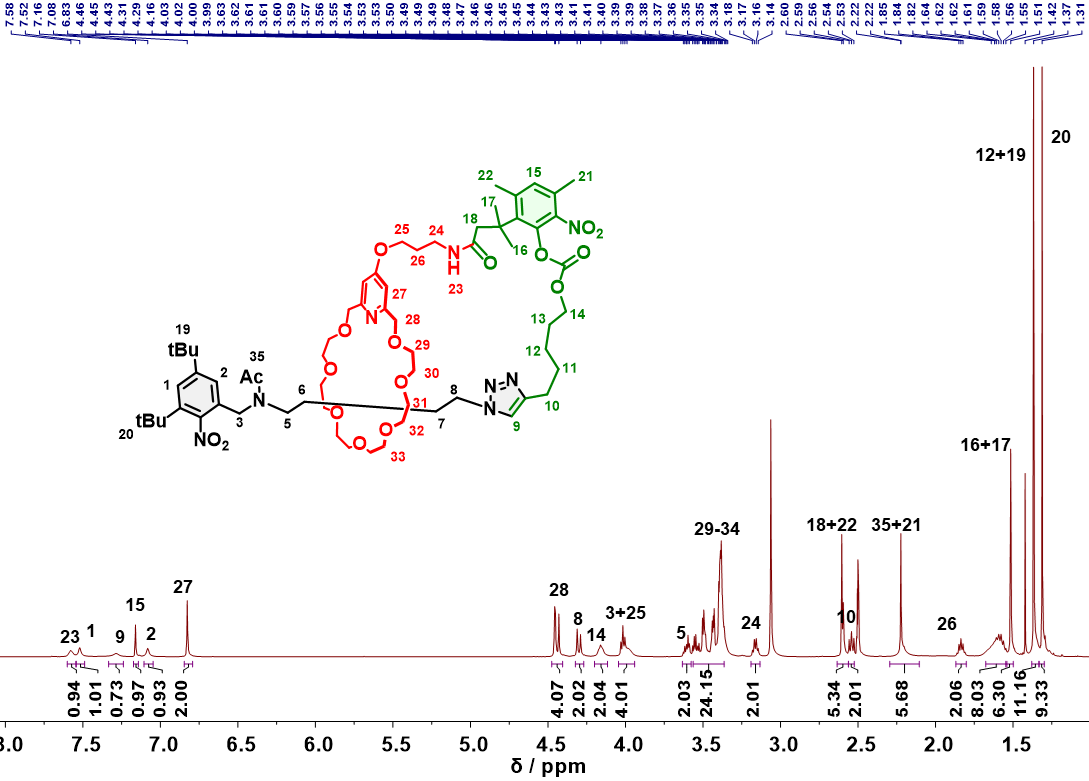
**

**Figure S22**. 1H NMR Spectrum (400 MHz, DMSO-*d6*, 353 K) of **MIM-1**.


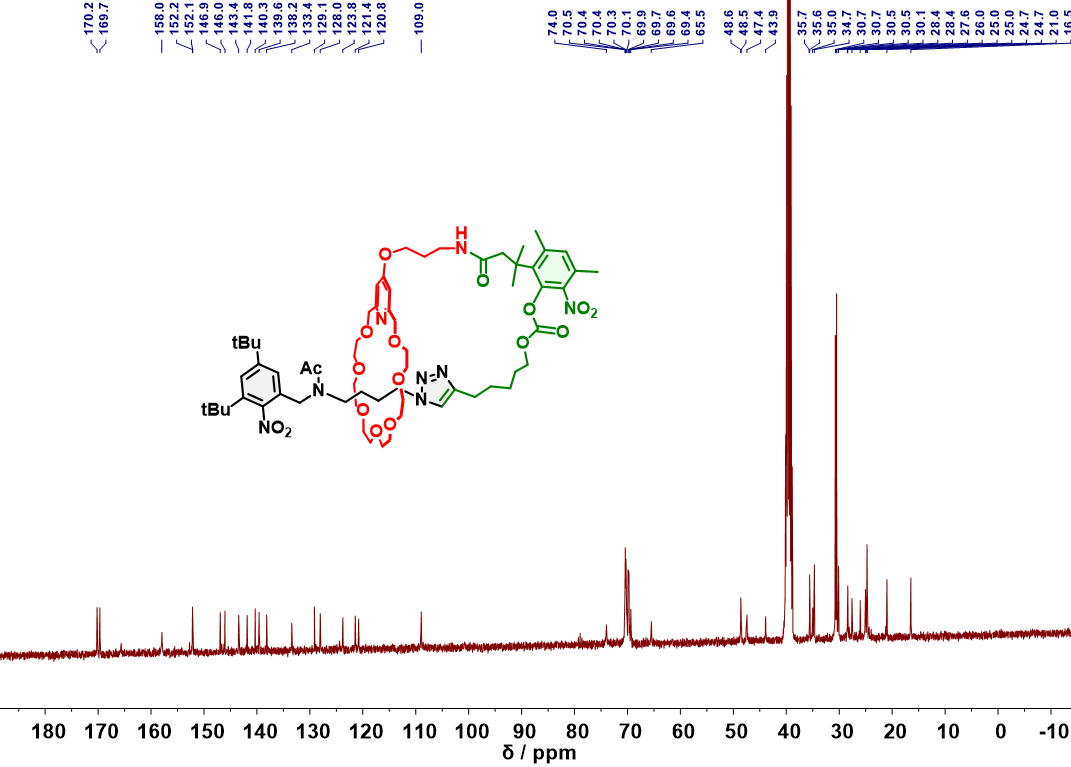


**Figure S23**. 13C NMR Spectrum (101 MHz, DMSO-*d6*, 298 K) of **MIM-1**.

**
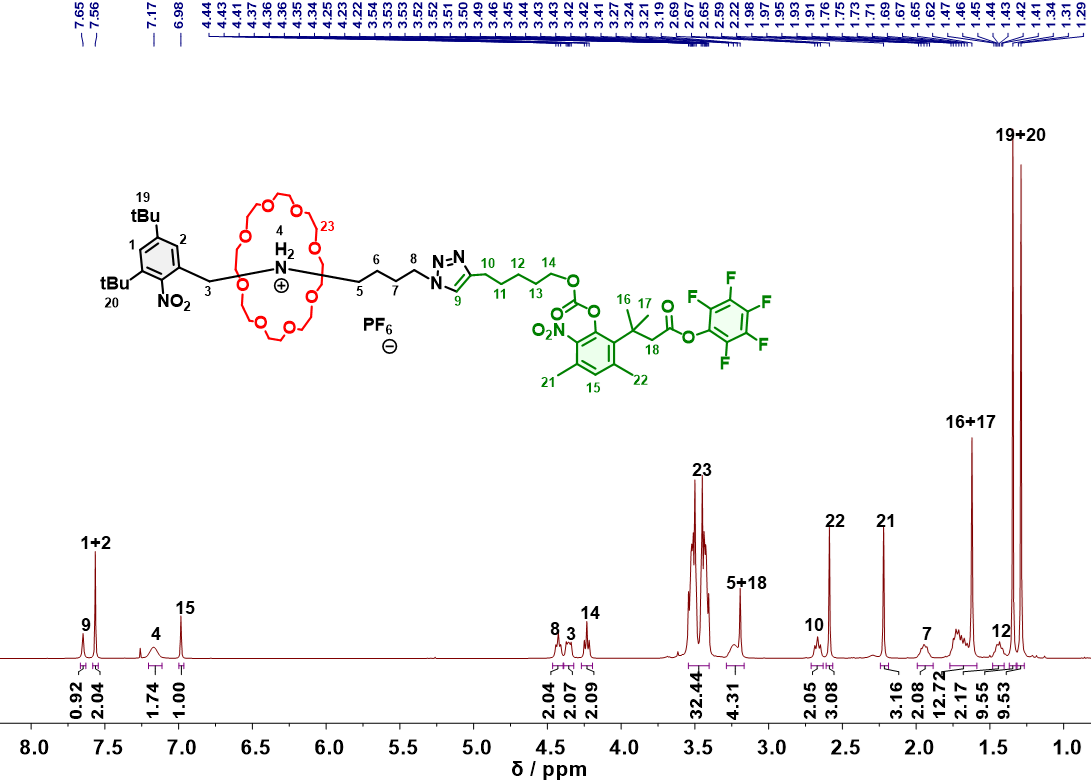
**

**Figure S24**. 1H NMR Spectrum (400 MHz, CDCl3, 298 K) of **Rox-3**.


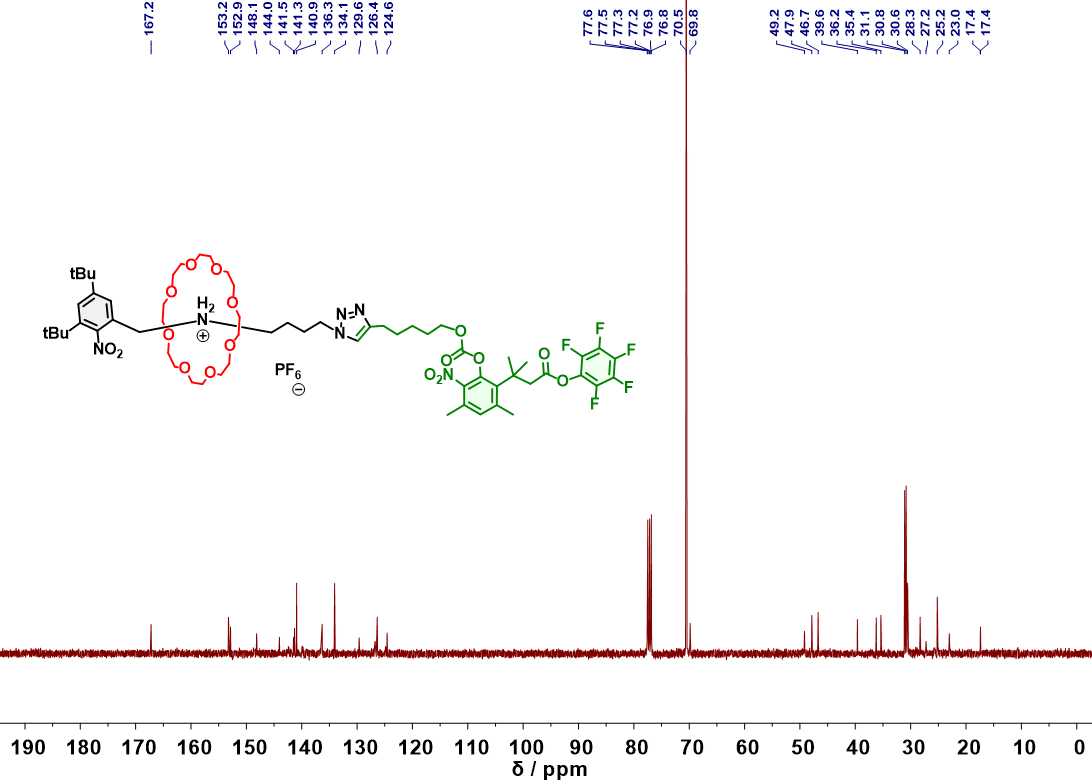


**Figure S25**. 13C NMR Spectrum (101 MHz, CDCl3, 298 K) of **Rox-3**.

**
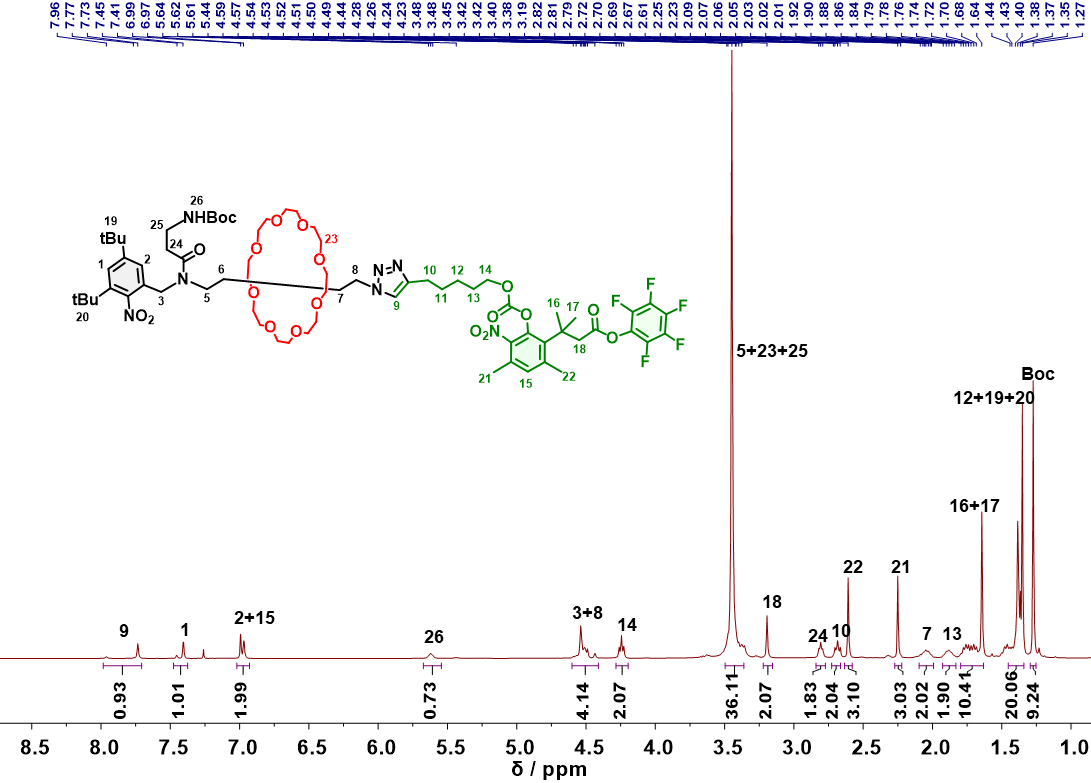
**

**Figure S26**. 1H NMR Spectrum (400 MHz, CDCl3, 298 K) of **Rox-4**.


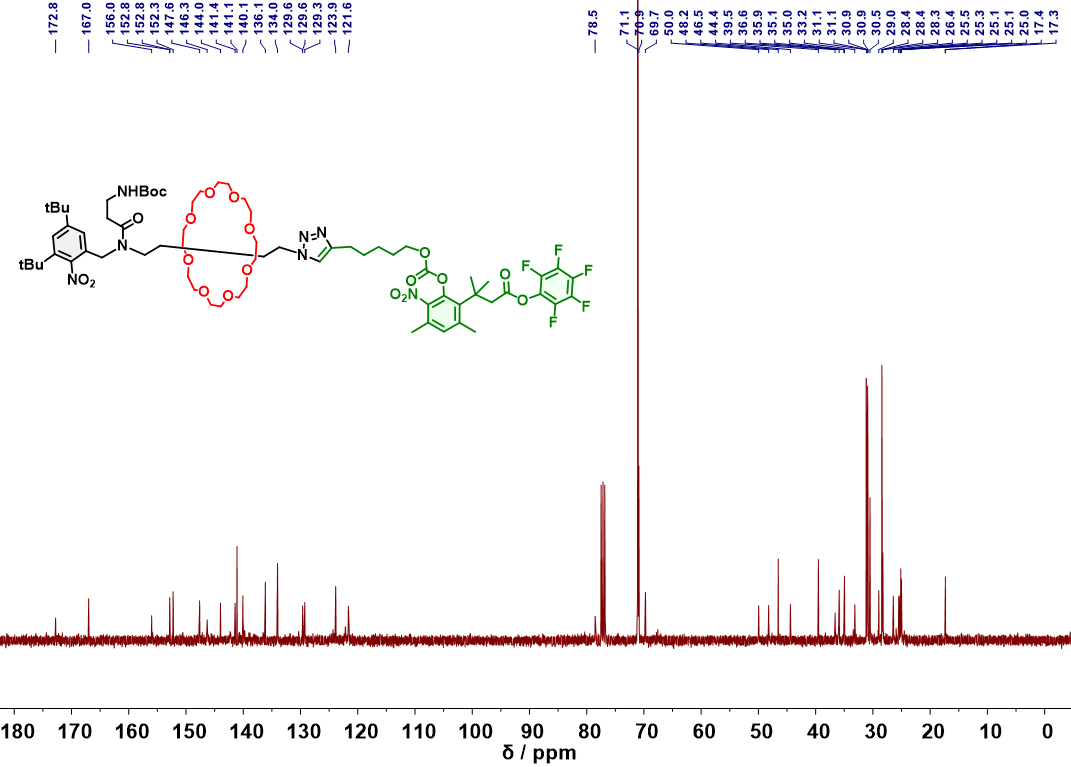


**Figure S27**. 13C NMR Spectrum (101 MHz, CDCl3, 298 K) of **Rox-4**.

**
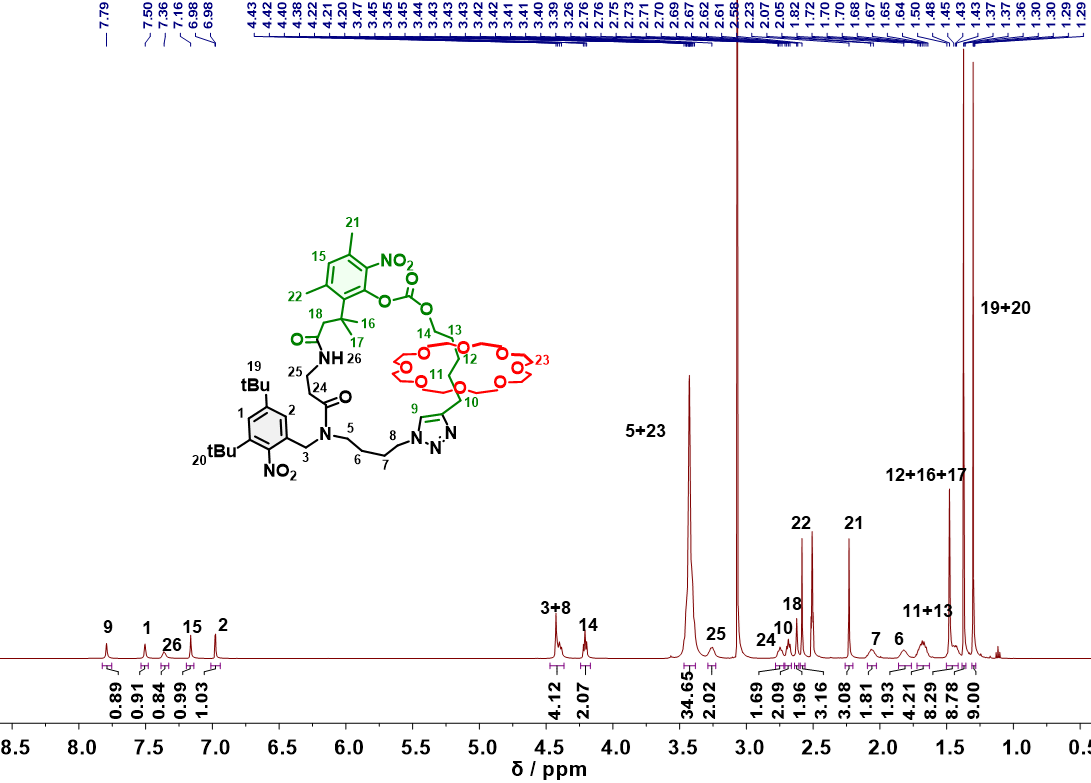
**

**Figure S28**. 1H NMR Spectrum (400 MHz, DMSO-*d6*, 353 K) of **MIM-2**.


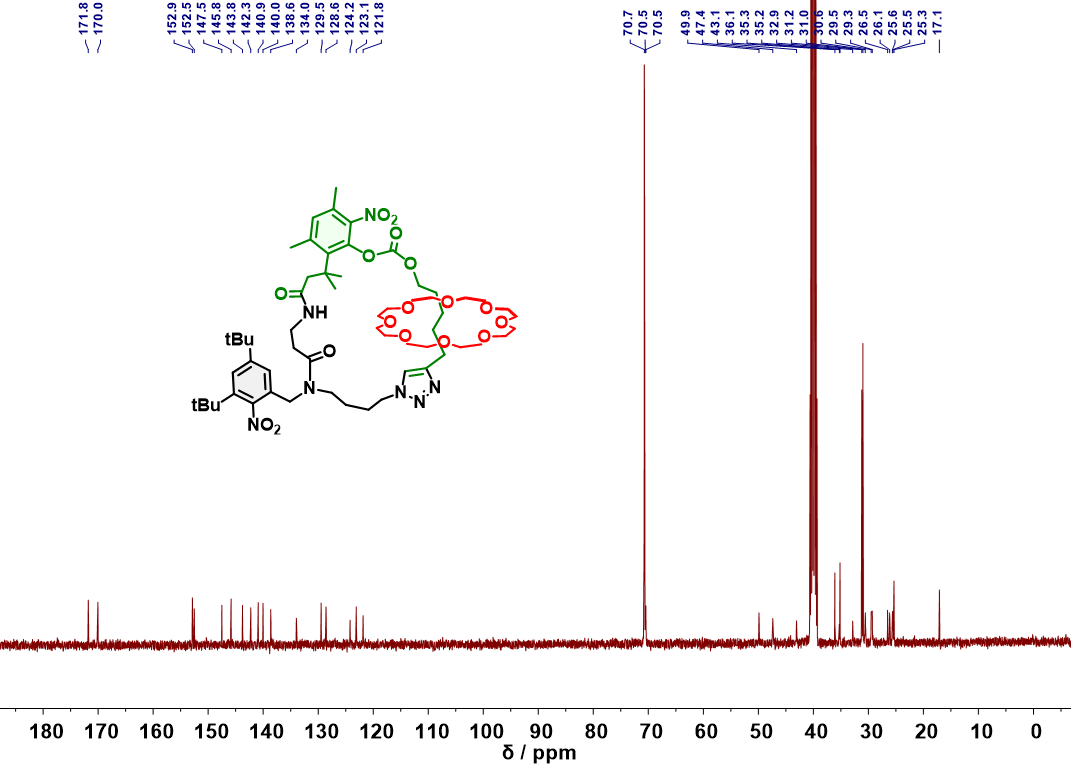


**Figure S29**. 13C NMR Spectrum (101 MHz, DMSO-*d6*, 298 K) of **MIM-2**.

The 1H-1H gCOSY NMR spectrum (Figure S16) of **MIM-1** exhibits that the 1H-1H correlations between adjacent protons, such as H10/H11, H13/H14, H23/H24, H26/H24,25, H27/H28, which further helps to verify the assignment of 1D 1H NMR spectrum of **MIM-1**.

**
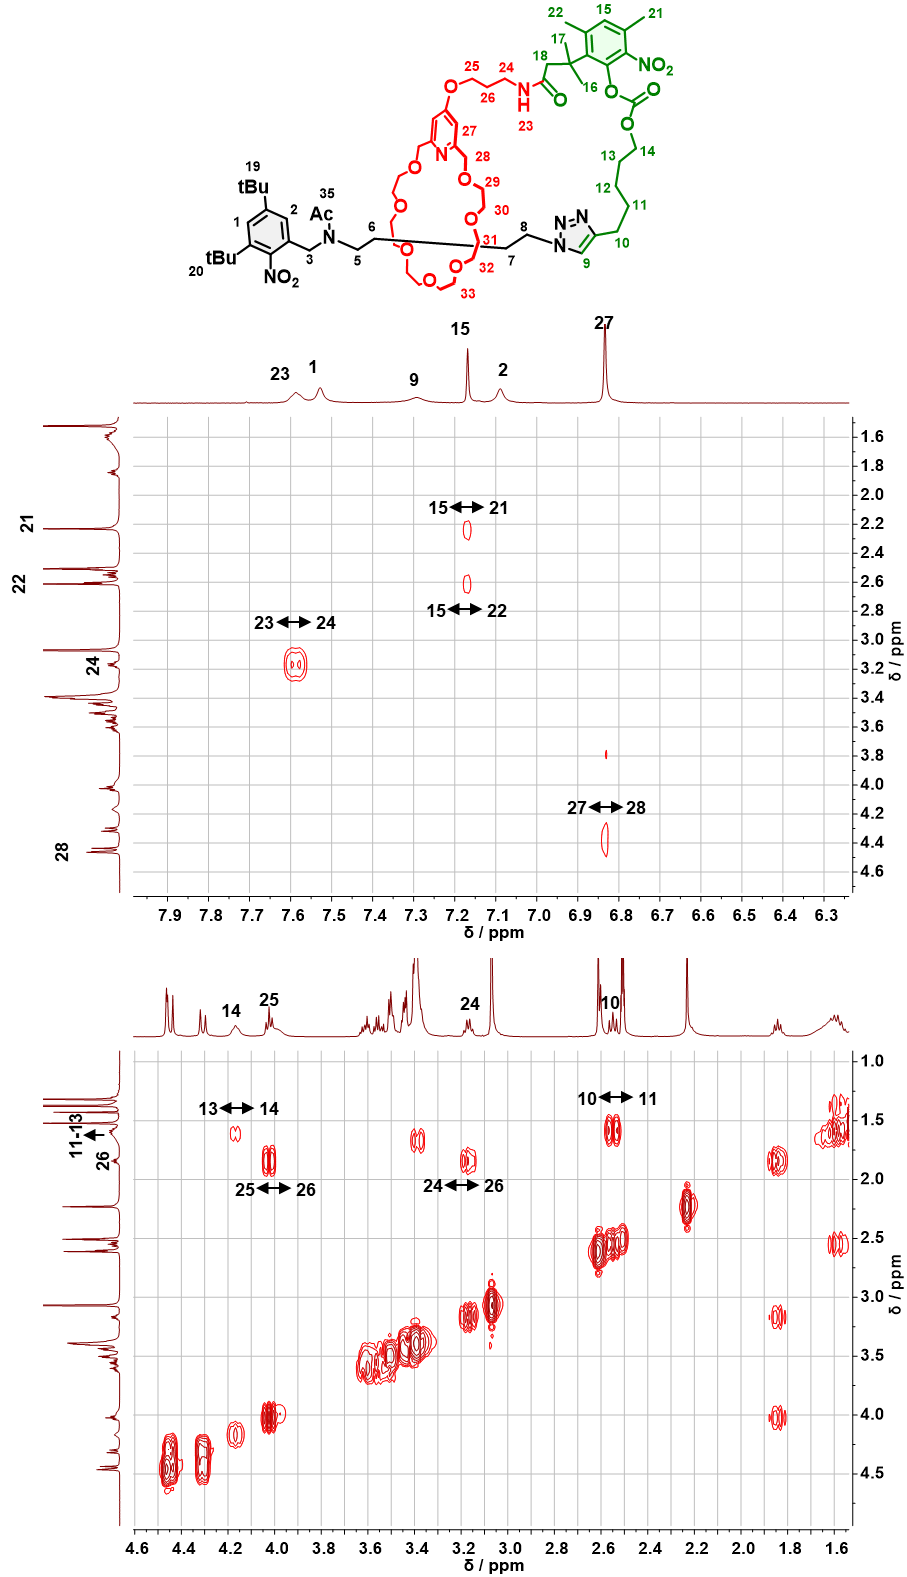
**

**Figure S30**. 1H-1H gCOSY NMR Spectrum (400 MHz, DMSO-*d6*, 353 K) of **MIM-1**.

The 1H-1H gCOSY NMR spectrum (Figure S16) of **MIM-2** exhibits that the 1H-1H correlations between adjacent protons, such as H2/H3, H5/H6, H8/H7, H10/H9,11, H13/H14, H15/H21,22, H25/H24,26, which further helps to verify the assignment of 1D 1H NMR spectrum of **MIM-2**.

**
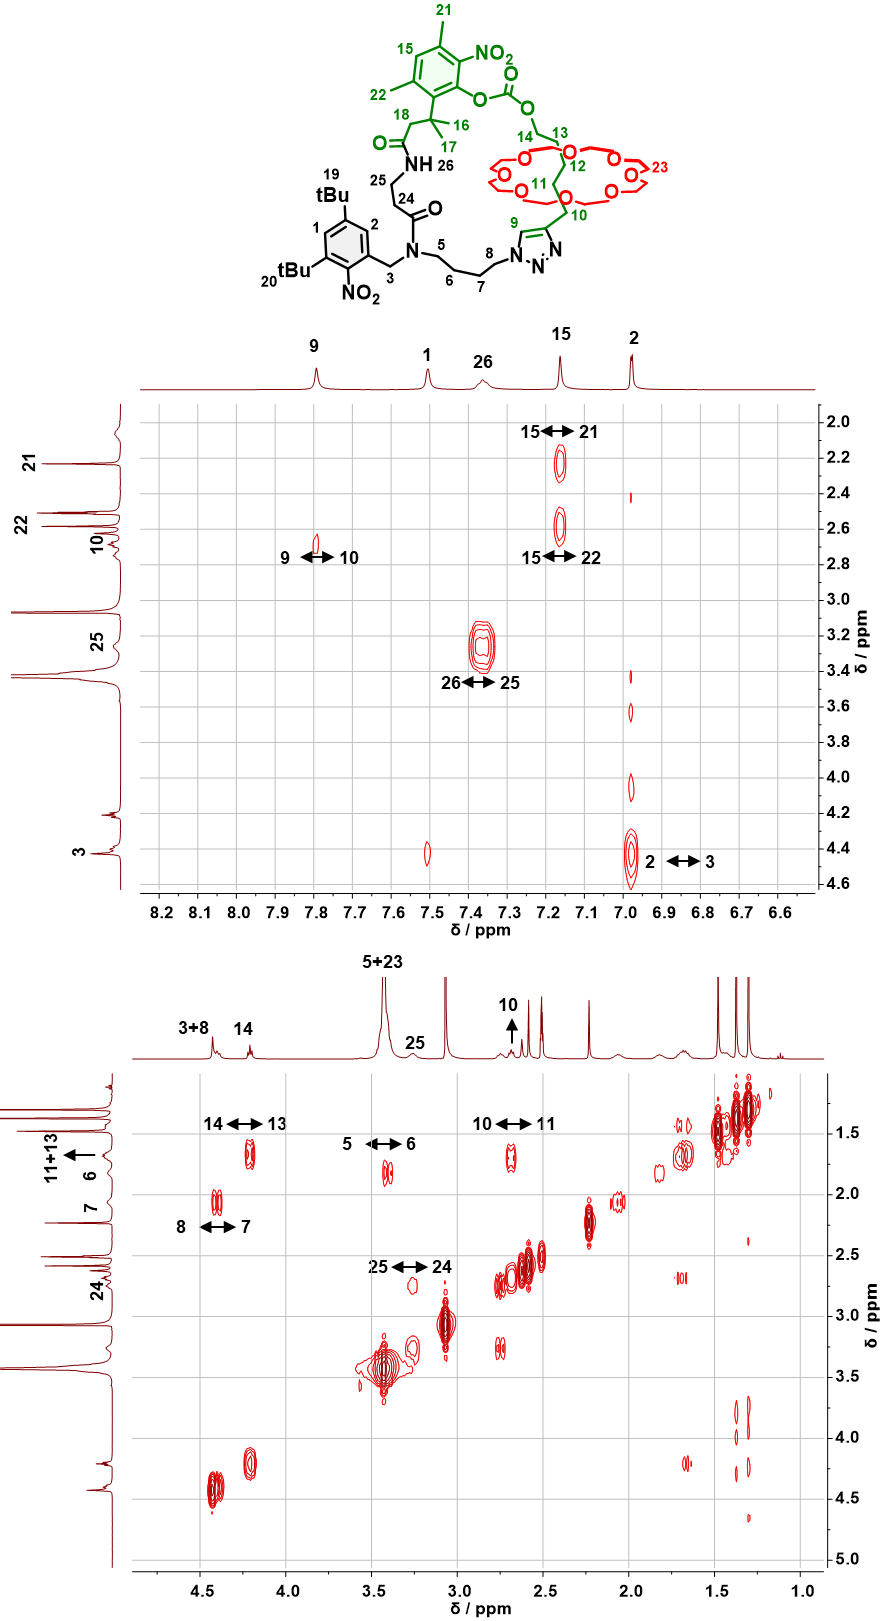
**

**Figure S31**. 1H-1H gCOSY NMR Spectrum (400 MHz, DMSO-*d6*, 353 K) of **MIM-2**.

The 2D NOE NMR spectrum (Figure S31) of **MIM-2** exhibits that there are NOE correlations between H1/H19,20, H2/H3,5,19, H15/H22, H23/H9,26, H8/H6,7,23, H14/H11,23, which further helps to verify the assignment of 1D 1H NMR spectrum of **MIM-1**.

**4. Homopolymerization**

**4.1 General polymerization procedure**

3-(3,5-ditert-butylphenoxy)propan-1-amine was used as initiator for all polymerization reactions. After dissolving monomer in designed solvent with designed initial monomer concentration and feed ratio, initiator was added to initiate the polymerization at designed temperature. The polymerization aliquots were taken at the designed reaction time for in-situ 1H NMR analysis to determine monomer conversion and for GPC analysis to determine *M*n, and *Ð*. The resultant polymer could be purified by precipitation.

**4.2 Polymerization of MIM-1 for evaluating its polymerization kinetics**

**Scheme S6.** ROP of **MIM-1**.

***MIM-1*** *polymerization with [****MIM-1****]0/[I]0=15:1.* In a 2 mL Agilent injection bottle, **MIM-1** (125 mg, 0.100 mmol) and 3-(3,5-ditert-butylphenoxy)propan-1-amine (1.75 mg, 6.70 μmol) were dissolved in 125 μL DMF. The polymerization was performed at the designed temperature of 90 °C. The polymerization aliquots were taken at the designed reaction time for in-situ 1H NMR analysis to determine **MIM-1** conversion and for GPC analysis to determine *M*n,GPC and *Ð*.

***MIM-1*** *polymerization with [****MIM-1****]0/[I]0=25:1.* In a 2 mL Agilent injection bottle, **MIM-1** (125 mg, 0.100 mmol) and 3-(3,5-ditert-butylphenoxy)propan-1-amine (1.05 mg, 4.00 μmol) were dissolved in 125 μL DMF. The polymerization was performed at 90 °C. Polymerization aliquots were taken at the designed reaction time for in-situ 1H NMR analysis to determine **MIM-1** conversion and for GPC analysis to determine *M*n,GPC and *Ð*.


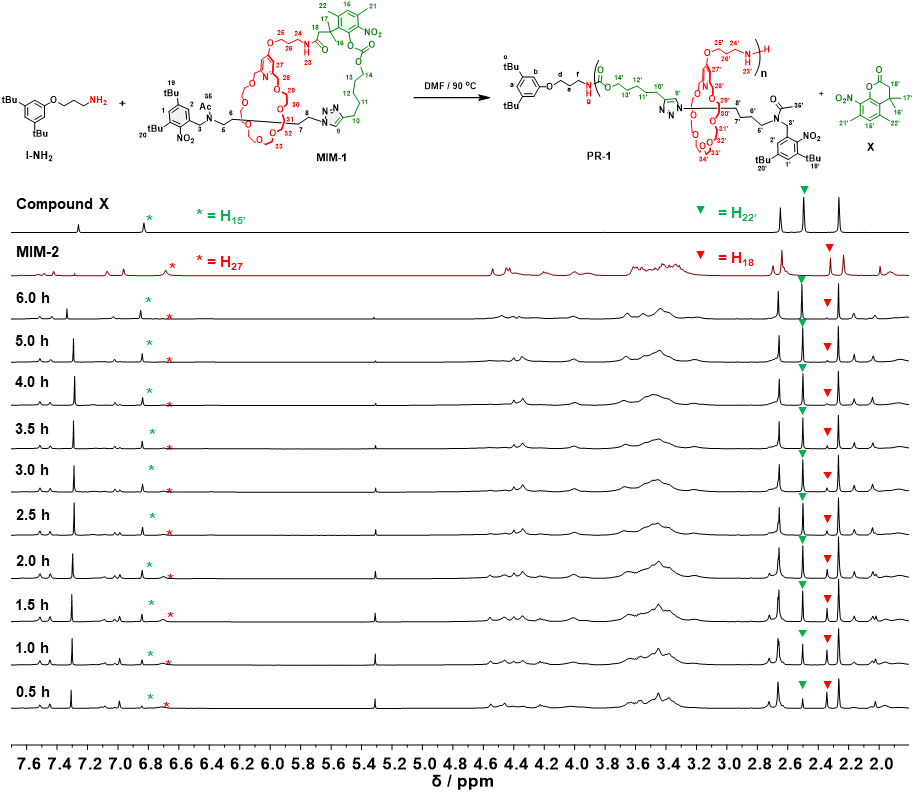


**Figure S32.** 1H NMR spectra (400 MHz, CDCl3, 298 K) of **compound X**, **MIM-1**, crude polymerization solution of **MIM-1** after 0.5-6.0 h reaction ([**MIM-1**]0/[I]0=15:1). **MIM-1** conversion was calculated by [Area(15’) + Area(22’)/3]/[Area(27)/2 + Area(15’) + Area(22’)/3 + Area(18)/2].


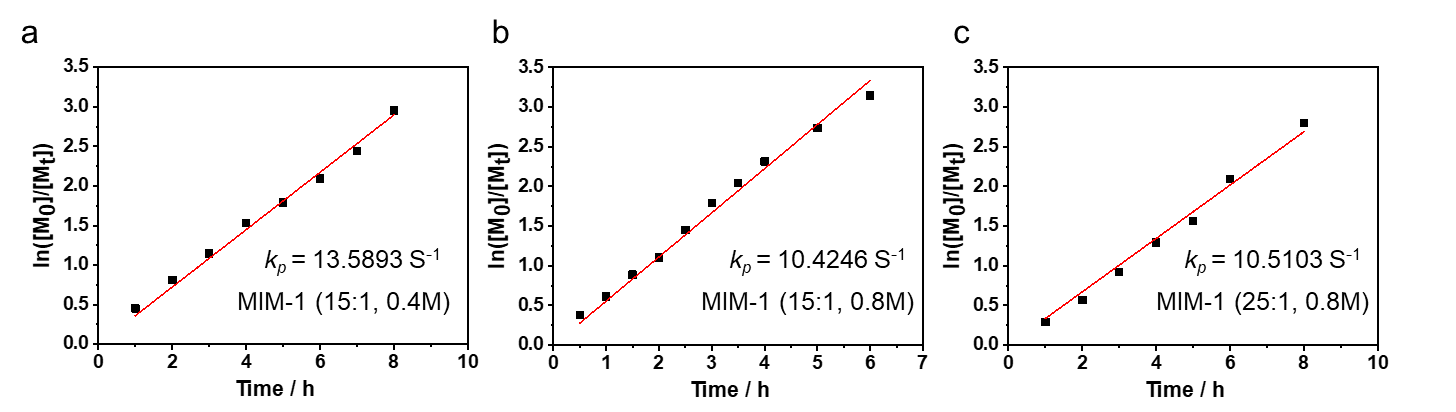


**Figure S33.** The*kp* value of polymerization reaction of **MIM-1**with [**MIM-1**]0/[I]0=15:1 in 0.4 M (a), [**MIM-1**]0/[I]0=15:1 in 0.8 M (b) and [**MIM-1**]0/[I]0=25:1 in 0.8 M (c).

**4.3 Polymerization of MIM-2 for evaluating its polymerization kinetics**

**Scheme S7.** ROP of **MIM-2**.

***MIM-2*** *polymerization with [****MIM-2****]0/[I]0=15:1.* In a 2 mL Agilent injection bottle, **MIM-2** (117 mg, 0.100 mmol) and 3-(3,5-ditert-butylphenoxy)propan-1-amine (1.75 mg, 6.70 μmol) were dissolved in 250 μL DMF. The polymerization was performed at 90 °C. Polymerization aliquots were taken at the designed reaction time for in-situ 1H NMR analysis to determine **MIM-2** conversion and for GPC analysis to determine *M*n,GPC and *Ð*.

***MIM-2*** *polymerization with [****MIM-2****]0/[I]0=25:1.* In a 2 mL Agilent injection bottle, **MIM-2** (117 mg, 0.100 mmol) and 3-(3,5-ditert-butylphenoxy)propan-1-amine (1.05 mg, 4.00 μmol) were dissolved in 250 μL DMF. The polymerization was performed at 90 °C. Polymerization aliquots were taken at the designed reaction time for in-situ 1H NMR analysis to determine **MIM-2** conversion and for GPC analysis to determine *M*n,GPC and *Ð*.

**
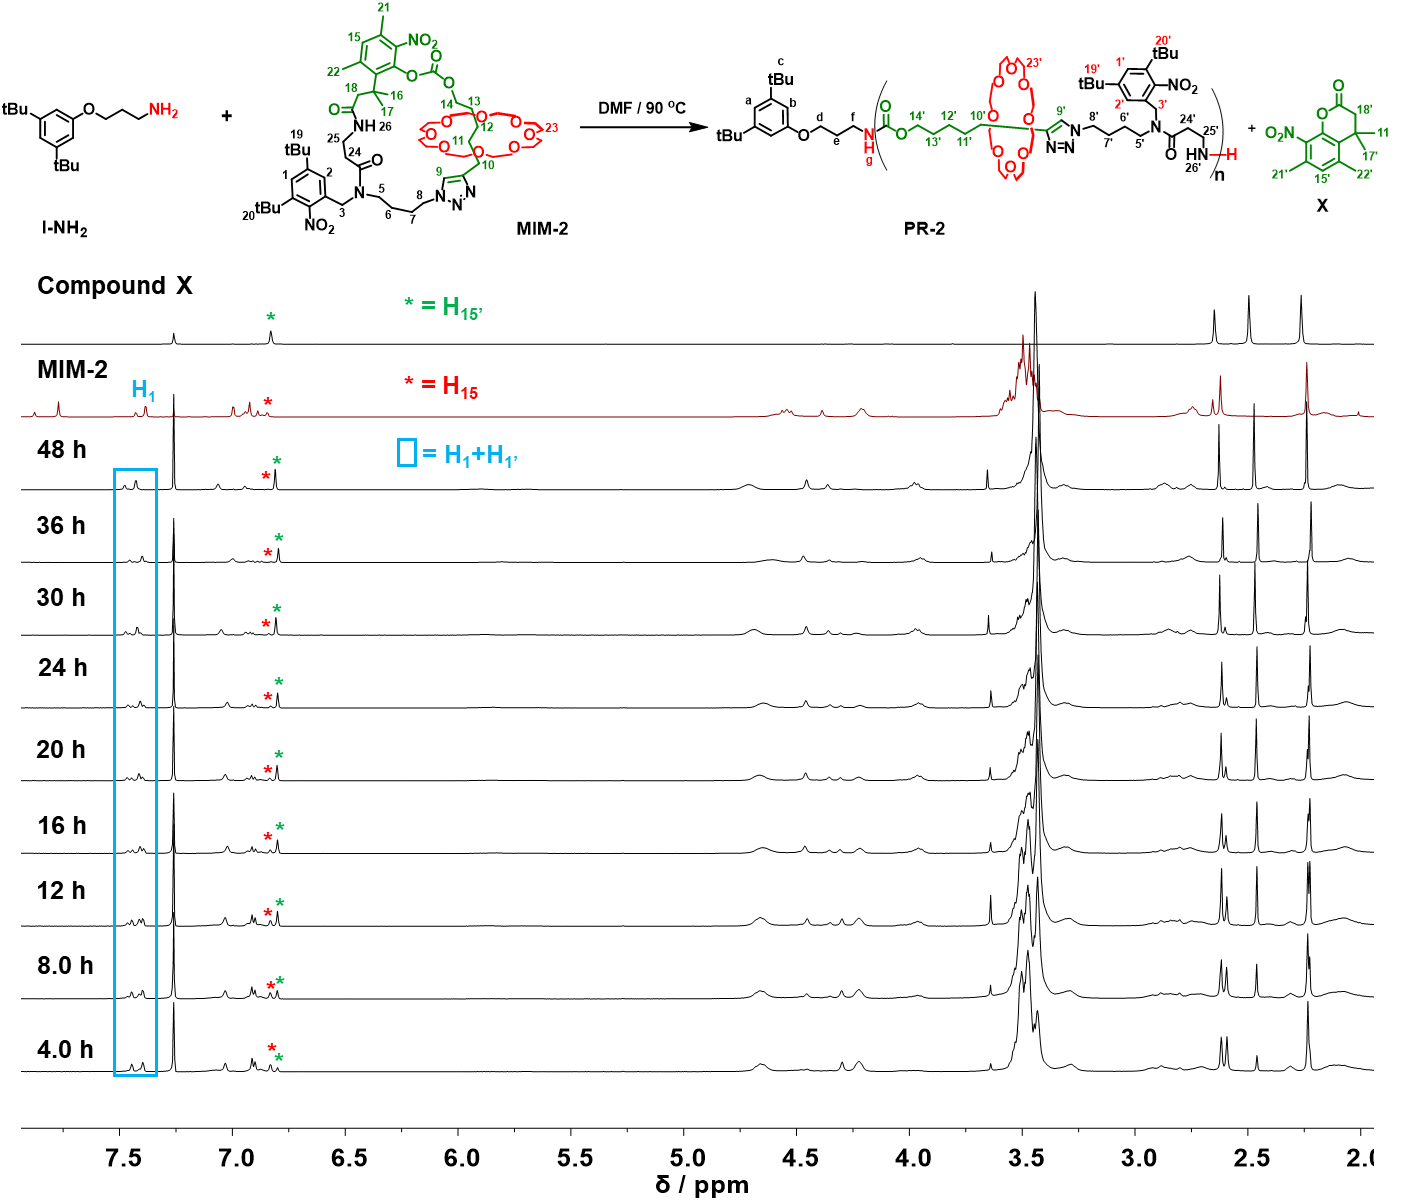
**

**Figure S34.** 1H NMR spectra (400 MHz, CDCl3, 298 K) of **compound X**, **MIM-2**, crude polymerization solution of **MIM-2** after 4.0-48 h reaction ([**MIM-2**]0/[I]0=15:1). **MIM-2** conversion was calculated by Area(15’)/ [Area(1)+Area(1’)].


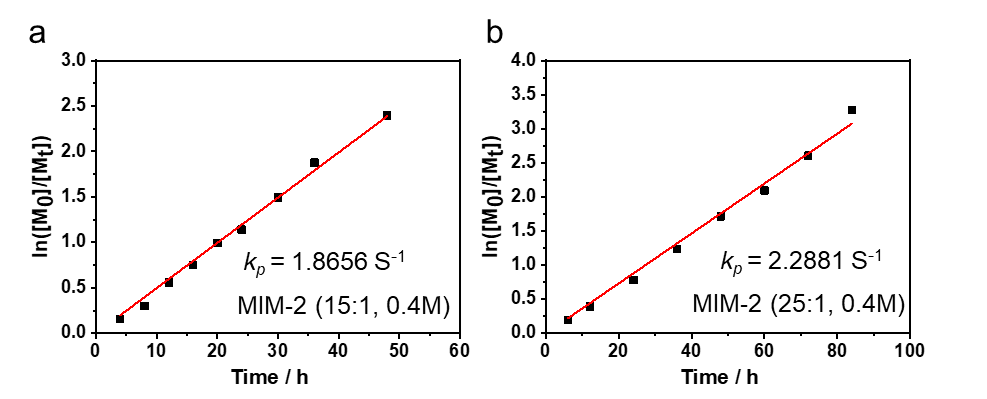


**Figure S35.** The*kp* value of polymerization reaction of **MIM-2**with [**MIM-2**]0/[I]0=15:1 in 0.40 M (a) and [**MIM-1**]0/[I]0=25:1 in 0.40 M (b).

**4.4 Preparation of diblock copolymer**

**Scheme S8.** Preparation of **PR-1**15-*b*-**PEG**15**.**

In a 2 mL Agilent injection bottle, **MIM-1** (125 mg, 0.100 mmol) and 3-(3,5-ditert-butylphenoxy)propan-1-amine (1.75 mg, 6.70 μmol) were dissolved in 100 μL DMF. The polymerization of **MIM-1** was performed in DMF at 90 °C for 6.5 h. In this condition, 1H-NMR analysis shows **MIM-1** conversion reached above 98.0%. GPC analysis produced *M*n,GPC = 21350 and *Ð* = 1.09 for **PR-115**. Then, **MEG** (55.6 mg, 0.100 mmol) was added directly into the polymerization solution to extend the polymer chain by polymerizing **MEG**. The polymerization reaction was further performed at 90 °C for another 3 h. In this condition, 1H-NMR analysis shows **MEG** conversion reached above 99.0%. GPC analysis produced *M*n,GPC = 31932 and *Ð* = 1.12 for the resultant **PR-1**15-**PEG**15.


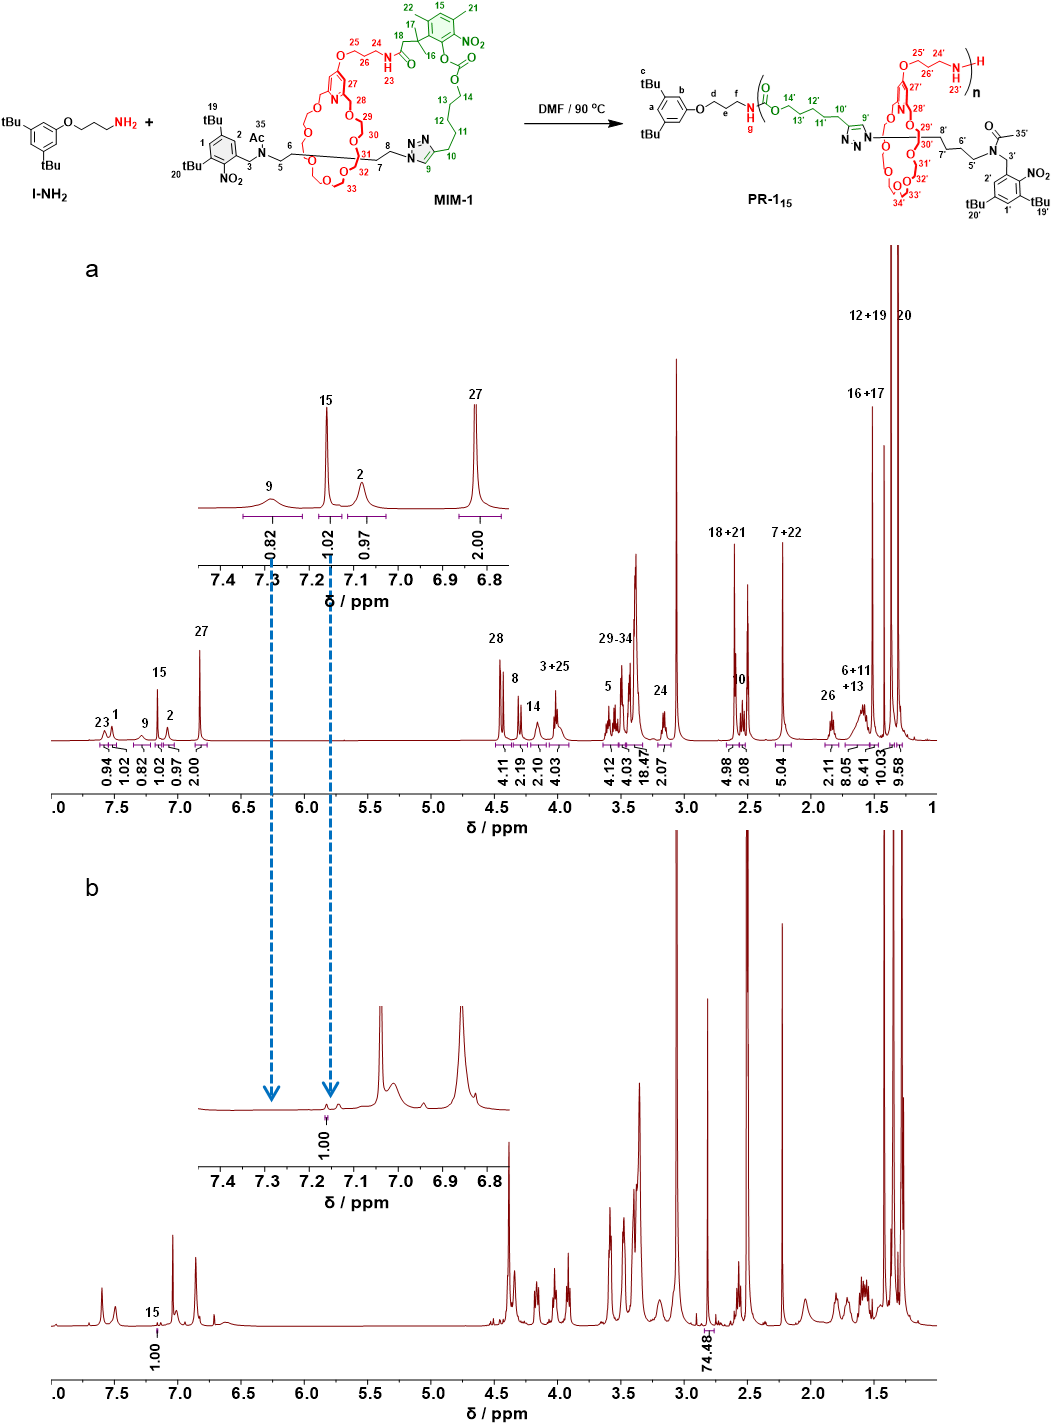


**Figure S36.** 1H NMR spectra (400 MHz, DMSO-*d6*, 353 K) of **MIM-1** (a) and the crude polymerization solution of **MIM-1** with 6.5 h reaction (b). The nearly quantitative **MIM-1** conversion was indicated by the disappearance of its characteristic peaks 9 and 15.


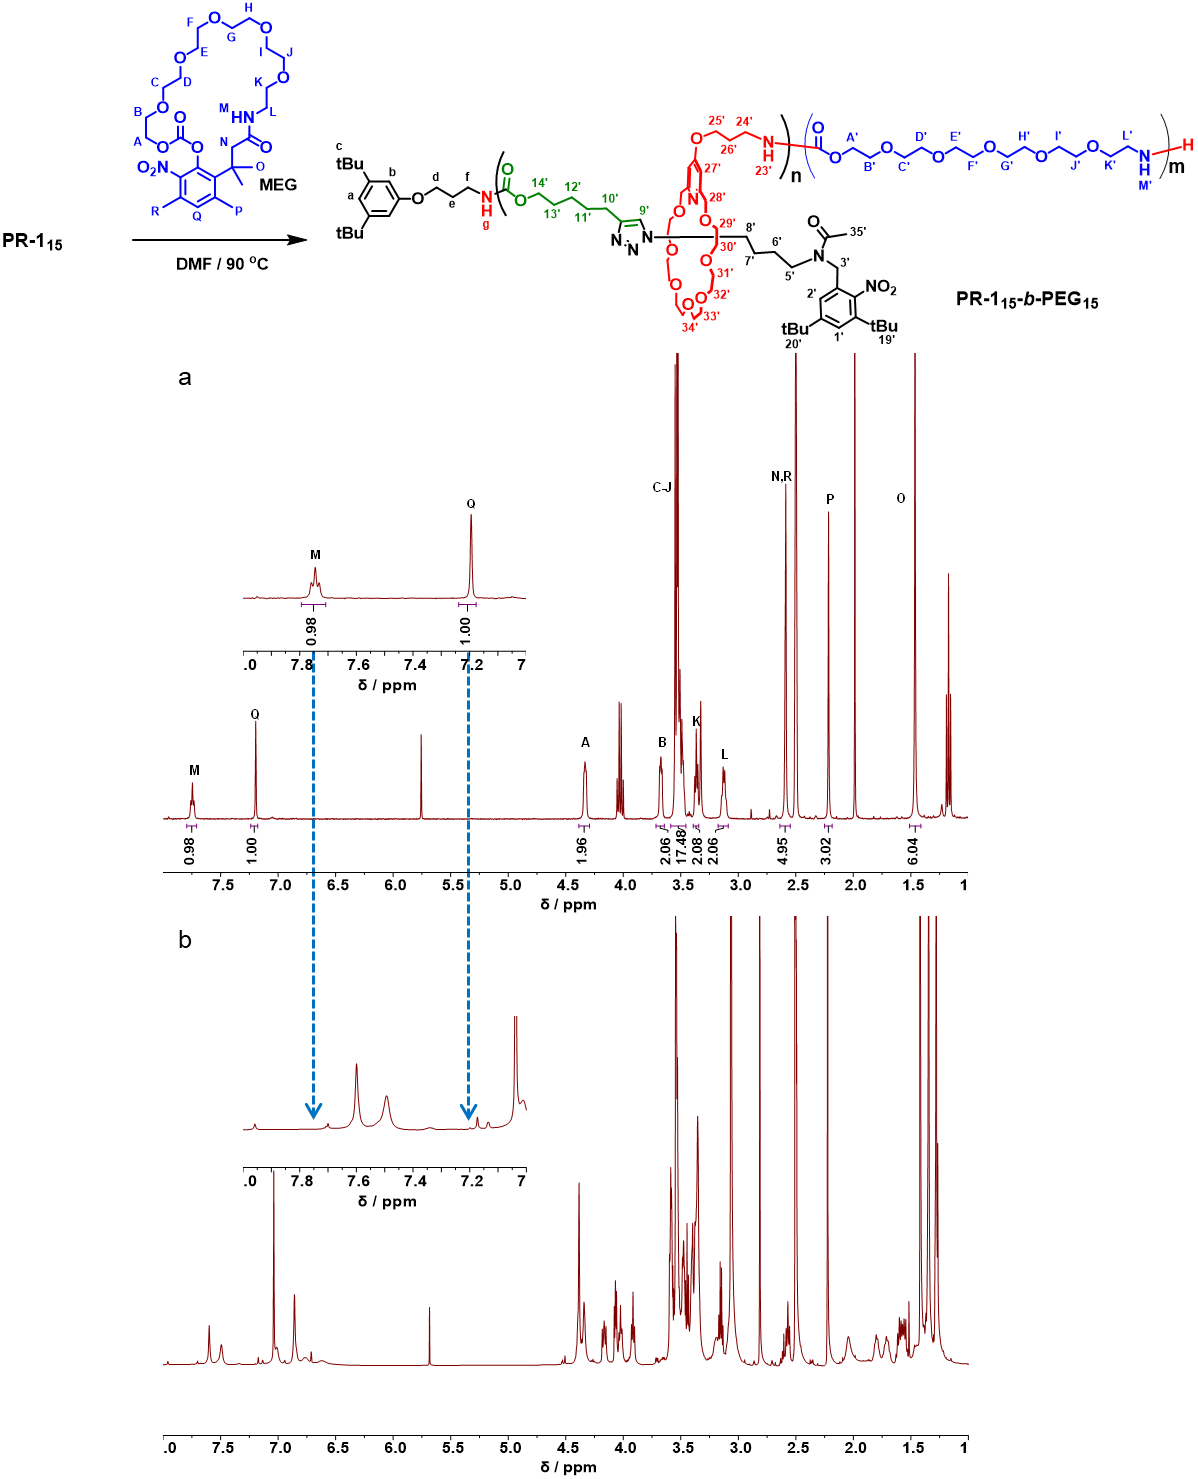


**Figure S37.** 1H NMR spectra (400 MHz, DMSO-*d6*, 353 K) of **MEG** (a) and the crude polymerization solution of **MEG** in 3 h (b). The nearly quantitative **MEG** conversion was indicated by the disappearance of its characteristic peaks M and Q.

**5. Crystallographic Characterization**

Crystallographic data for have been deposited in the Cambridge Crystallographic Data Center (CCDC) under accession numbers **CCDC: 2481822**. All crystallographic data are available free of charge from the Cambridge Crystallographic Data Centre via [www.ccdc.cam.ac.uk/data_request/cif](http://www.ccdc.cam.ac.uk/data_request/cif) .

**5.1 Methods.** Single crystals of **MIM-2** were grown in DMSO-*d6* over one week. The crystallographic data were collected on Rigaku Xtalab Synergy R with a rotation-anode generator Cu Kα radiation (λ= 1.54178 Å), a 4-circle kappa goniometer, and a HyPix-6000C Photon Detector. The collection temperature was controlled via an Oxford Cryo 1000 stream system at 100 K for **MIM-2**, respectively. Data reduction and analysis were both performed with the CrysAlisPro software. The structures were solved by direct methods using ShelXT program and refined anisotropically by full-matrix least squares techniques based on F2 using the SHELXL installed on Olex 2. Anisotropic thermal parameters were used for the non-hydrogen atoms and isotropic parameters for the hydrogen atoms. Hydrogen atoms were added geometrically and refined using a riding model and the weighting schemes were refined.

**5.2 Crystal data.** C59H93N7O17 (*M*=1172.40 g/mol): triclinic, space group P-1 (no. 2), *a* = 8.94590(10) Å, *b* = 17.2753(2) Å, *c* = 21.8372(3) Å, *α* = 110.1070(10)°, *β* = 91.7090(10)°, *γ* = 93.8590(10)°, *V*= 3156.86(7) Å3, *Z* = 2, *T* = 100.00(10) K, μ(Cu Kα) = 0.744 mm-1, *Dcalc* = 1.233 g/cm3, 40532 reflections measured (4.316° ≤ 2Θ ≤ 153.088°), 12687 unique (*R*int = 0.0749, Rsigma = 0.0573) which were used in all calculations. The final *R*1 was 0.0730 (I > 2σ(I)) and *wR*2 was 0.2149 (all data).


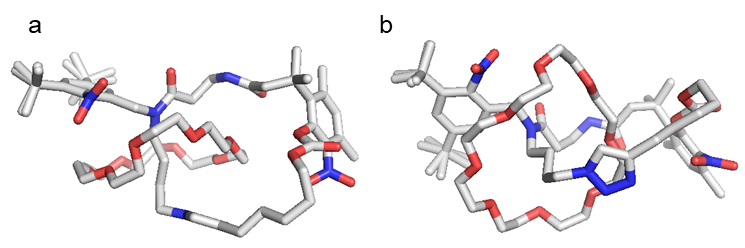


**Figure S38.** (a) Top-down view and (b) Side-on view of crystal structure of **MIM-2**.

**6. Molecular dynamics simulations**

Molecular dynamics (MD) simulations were carried out using GROMACS 2022.2. A cubic simulation box was constructed and filled with DMF solvent molecules, into which a single **MIM-1** or **MIM-2** molecule was inserted. The system underwent energy minimization, followed by NVT and NPT equilibration at 363.15 K. Subsequently, a 20 ns MD simulation was performed under periodic boundary conditions. For trajectory analysis, the gmx mindist tool was used to compute the minimum distance between the carbonate and crown ether groups over time.


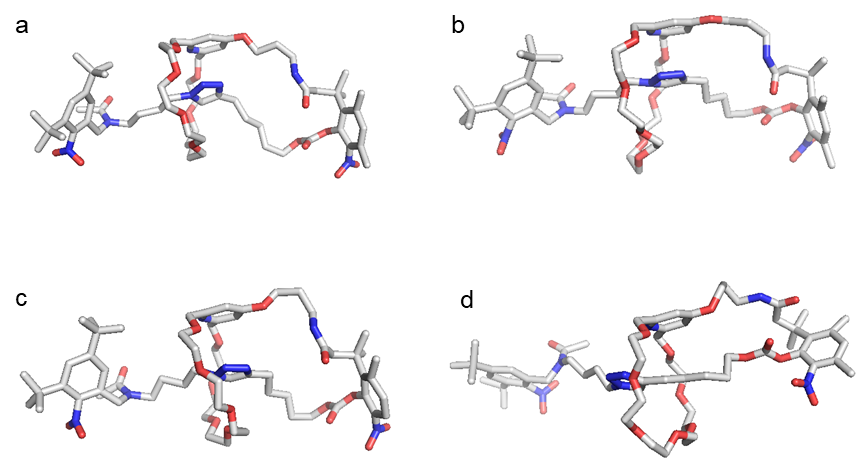


**Figure S39.** Conformational evolution of **MIM-1** at 0 ns (a), 5 ns (b), 10 ns (c) and 15 ns (d) during molecular dynamics simulations.


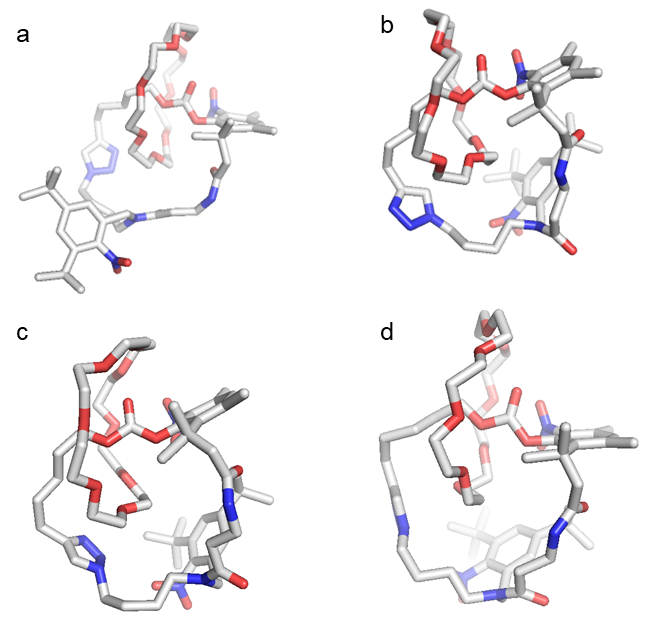


**Figure S40.** Conformational evolution of **MIM-2** at 0 ns (a), 5 ns (b), 10 ns (c) and 15 ns (d) during molecular dynamics simulations.

**7. Theoretical Calculations**

Molecular Theoretical calculations were performed with the Gaussian16 program suiteS7. The molecular geometry optimizations were carried out with the m062x method at the 6-31G(d) level, and use the scf=novaracc solvent model to calculate the optimal conformation in aqueous solution. The results were visualized using a PyMOL software.

**7.1 Optimized conformations of MIM-1 and MIM-2**


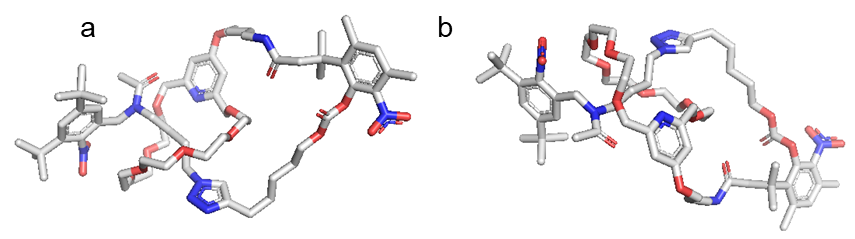


**Figure S41.** (a) Side-on view and (b) Top-down view of the optimized conformations of **MIM-1**.


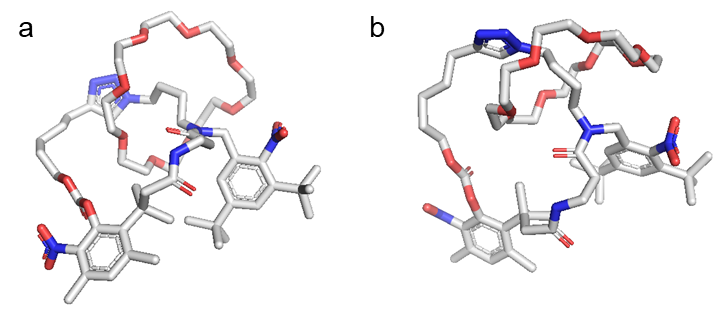


**Figure S42.** (a) Side-on view and (b) Top-down view of the optimized conformations of **MIM-2**.

**7.2 Optimized** **geometry coordinatesMIM-1**

C -3.183163 -2.085941 1.356538

C -3.946517 -3.081490 0.886045

C -3.833020 -3.653869 -0.331983

C -2.860615 -3.176688 -1.163014

C -2.040297 -2.191387 -0.703237

C -2.219648 -1.677832 0.524814

C -0.848283 -1.683855 -1.524030

N 0.063117 -0.874427 -0.715970

C 1.091361 -1.657186 -0.015772

C 2.360795 -1.737749 -0.874340

C 3.541045 -2.454478 -0.201545

C 4.789468 -2.417184 -1.098207

N 5.999358 -2.907941 -0.412645

C 6.972395 -2.131240 -0.178573

C 7.858881 -2.945710 0.406196

N 7.388160 -4.119036 0.489454

N 6.244665 -4.052023 -0.026696

O 3.955927 5.743673 0.081923

C 5.229781 6.270113 -0.224787

C 6.337213 5.522236 0.516929

C 7.761045 6.084084 0.367122

C 9.247262 -2.634598 0.894390

O 1.150613 -5.657289 -0.659134

O 1.372251 -4.366068 -3.207320

O 2.156770 -1.820046 -4.496043

O 2.857408 0.935499 -3.330475

O 3.407041 0.516394 1.952692

O 2.803158 -2.157959 3.249089

O 1.540188 -4.645155 2.175163

C 2.963976 -0.779686 -4.996380

C 2.390753 0.575948 -4.608296

C 2.428715 2.230889 -2.946562

C 3.973630 2.141958 0.248734

C 4.452657 1.022321 1.144307

C 3.888538 -0.037843 3.152365

C 2.799481 -0.869057 3.814508

C 1.948894 -3.047840 3.922607

C 2.190289 -4.459674 3.408752

C 1.756643 -5.936885 1.655734

C 0.738095 -6.220745 0.563084

C 0.101657 -5.651077 -1.596824

C 0.635926 -5.550935 -3.015346

C 1.698469 -4.189302 -4.566251

C 2.725062 -3.083087 -4.751275

N 3.486812 1.808741 -0.871321

C 3.072831 2.706243 -1.660613

C 3.205899 4.014957 -1.381944

C 3.805660 4.419492 -0.249248

C 4.108120 3.427189 0.605904

C 8.725427 5.121582 1.081703

N 10.123399 5.552856 1.027521

O 14.723344 3.321260 -0.802799

C 14.398980 2.256373 0.004401

O 14.062857 1.092281 -0.632759

O 14.345075 2.383297 1.211168

C 12.530041 5.287682 1.261054

C 15.432320 4.360579 -0.258287

C 16.786057 4.232903 -0.131021

C 17.489839 5.245974 0.418120

C 16.811872 6.323149 0.831115

C 15.484548 6.469928 0.704911

C 14.756610 5.493514 0.106786

C 13.196021 5.638942 -0.095189

C 12.769399 7.066291 -0.545129

C 12.544601 4.785180 -1.228441

C 14.953837 7.757743 1.308380

C 18.991449 5.256831 0.653216

C 11.147027 4.662173 1.206352

O 10.966525 3.474189 1.323326

C 13.546348 -0.000604 0.085226

C 9.902470 -1.439076 0.185757

C 11.384735 -1.274280 0.568993

C 12.030652 -0.064074 -0.123352

N -2.654778 -3.578961 -2.343079

O -3.218582 -4.557649 -3.000366

O -1.804622 -3.071950 -3.209522

C -4.844453 -4.789534 -0.655685

C -5.867402 -5.122152 0.480717

C -4.104130 -6.141070 -0.825251

C -5.785660 -4.385537 -1.819201

C -3.339035 -1.446636 2.743147

C -4.538992 -1.982790 3.557631

C -2.060553 -1.710080 3.570414

C -3.551098 0.077184 2.583709

O 0.724559 1.139835 0.118527

C -0.011673 0.497241 -0.589895

C -1.104545 1.195821 -1.389024

N 17.388193 3.194811 -0.528122

O 16.849696 2.128505 -1.071360

O 18.683273 2.979764 -0.505707

H -4.717313 -3.425751 1.578093

H -1.556091 -0.889867 0.899775

H -0.221143 -2.532486 -1.878315

H -1.181143 -1.084413 -2.399081

H 1.319833 -1.204561 0.975473

H 0.726805 -2.684514 0.220035

H 2.670629 -0.700260 -1.130859

H 2.127073 -2.252732 -1.833170

H 3.774783 -1.957206 0.767038

H 3.265369 -3.509923 0.028546

H 4.942881 -1.381648 -1.483686

H 4.611103 -3.055734 -1.993699

H 7.023545 -1.066641 -0.428179

H 5.226150 7.341379 0.083350

H 5.387570 6.228515 -1.327125

H 6.086282 5.494109 1.604939

H 6.374256 4.473823 0.136207

H 7.824326 7.102980 0.815855

H 8.033124 6.164809 -0.711778

H 9.205650 -2.433749 1.991226

H 9.881286 -3.541521 0.744053

H 2.980374 -0.856496 -6.109850

H 4.005478 -0.886534 -4.614456

H 2.745165 1.336402 -5.343827

H 1.276852 0.557653 -4.614789

H 2.686632 2.952174 -3.755627

H 1.323964 2.221393 -2.807437

H 5.278499 1.413374 1.781263

H 4.878446 0.188492 0.542585

H 4.184613 0.802571 3.824607

H 4.783889 -0.672099 2.955391

H 1.795165 -0.403442 3.690035

H 3.031295 -0.949079 4.902655

H 2.183760 -3.026370 5.012837

H 0.889608 -2.737675 3.773856

H 3.281041 -4.658130 3.295612

H 1.765802 -5.181499 4.146623

H 1.612458 -6.689477 2.466338

H 2.799796 -6.017392 1.272994

H -0.257492 -5.816716 0.860851

H 0.647015 -7.324050 0.418908

H -0.573807 -4.801591 -1.358084

H -0.485255 -6.596818 -1.520193

H -0.227907 -5.567104 -3.721276

H 1.291932 -6.427805 -3.226748

H 2.136206 -5.136481 -4.962092

H 0.772433 -3.954783 -5.141153

H 3.599674 -3.238419 -4.079999

H 3.079035 -3.121166 -5.808791

H 2.838171 4.769054 -2.096922

H 4.520257 3.668777 1.599248

H 8.439158 5.023213 2.155395

H 8.623774 4.117856 0.605235

H 10.339236 6.547902 0.969708

H 13.171842 4.554367 1.800288

H 12.477267 6.164315 1.942360

H 17.386877 7.134002 1.308059

H 11.714335 7.120722 -0.892305

H 12.755045 7.829820 0.253977

H 13.407688 7.426262 -1.383987

H 11.503987 5.092290 -1.473840

H 13.116932 4.873377 -2.180433

H 12.387778 3.715421 -0.975439

H 14.040387 7.604462 1.917715

H 15.650679 8.211165 2.047869

H 14.813214 8.536828 0.526032

H 19.303426 4.422463 1.321403

H 19.550699 5.227183 -0.309287

H 19.352013 6.176482 1.164915

H 14.016882 -0.921413 -0.332361

H 13.812438 0.034298 1.162213

H 9.354011 -0.499780 0.436764

H 9.825940 -1.588036 -0.918158

H 11.482437 -1.157362 1.674612

H 11.934913 -2.202052 0.281381

H 11.819683 -0.122342 -1.218604

H 11.564028 0.878414 0.252582

H -6.556275 -5.944905 0.181240

H -5.380729 -5.481866 1.415761

H -6.533678 -4.265647 0.732358

H -3.277985 -6.165110 -1.558795

H -3.624410 -6.445859 0.133055

H -4.804013 -6.953828 -1.124295

H -6.470583 -5.218466 -2.096773

H -6.417127 -3.515580 -1.526500

H -5.303988 -4.066708 -2.760845

H -4.620452 -1.470033 4.542822

H -5.506004 -1.808445 3.032964

H -4.441021 -3.068720 3.783124

H -1.151139 -1.257863 3.116462

H -2.145562 -1.283206 4.595316

H -1.873272 -2.803131 3.675736

H -3.711402 0.570827 3.568747

H -2.683488 0.594186 2.118210

H -4.444350 0.289156 1.952635

H -0.903506 1.134909 -2.481963

H -2.111824 0.782927 -1.158006

H -1.139390 2.278788 -1.132233

**MIM-2**

C -0.88400000 5.97700000 0.18700000

C 0.43700000 6.34600000 0.16000000

O 1.40000000 5.37500000 0.36900000

C -1.35500000 4.48700000 0.40600000

N -1.47400000 1.91100000 2.57700000

C -2.27700000 2.99300000 2.35000000

C -1.54000000 4.26100000 1.92700000

N -0.88200000 -1.90800000 0.54000000

C -0.95600000 -0.69700000 1.20600000

N 4.64000000 -2.43500000 -1.04800000

C 6.05900000 1.43500000 -1.08200000

C 6.78200000 0.25400000 -1.74800000

C 4.46500000 4.28400000 -1.29900000

C 5.80500000 3.92900000 -0.63700000

C 6.62100000 2.83700000 -1.36400000

C 2.32000000 5.13400000 -0.63500000

O 3.48800000 4.49600000 -0.30900000

C 0.81500000 7.65000000 -0.03600000

C -0.12600000 8.59300000 -0.25600000

C -1.40700000 8.22200000 -0.18500000

C -1.80500000 6.96800000 0.06600000

C -0.39400000 3.38600000 -0.11900000

C -2.65000000 4.11300000 -0.36900000

O -3.47300000 2.96200000 2.49500000

O 2.06100000 5.49200000 -1.76600000

N 5.65000000 -2.72300000 -0.40500000

N 6.55700000 -1.86700000 -0.57200000

C 6.06000000 -1.01100000 -1.36200000

C 4.81400000 -1.36400000 -1.70000000

C -1.90900000 -2.95700000 0.58600000

C -3.25500000 -2.57000000 -0.05000000

C -3.22500000 -1.49500000 -0.86000000

C -4.32400000 -0.93900000 -1.38100000

C -5.47200000 -1.54200000 -1.04700000

C -5.59000000 -2.64700000 -0.28200000

C -4.44100000 -3.19600000 0.21200000

C 0.13700000 10.06500000 -0.52900000

C -3.31000000 6.84000000 0.22700000

C -2.19500000 -0.43300000 2.06300000

C -1.96300000 0.64500000 3.14000000

O -0.10800000 0.15600000 1.12100000

C 0.30000000 -2.28500000 -0.24000000

C 1.20700000 -3.28000000 0.50200000

C 2.70900000 -2.98400000 0.37400000

C 3.31000000 -3.08100000 -1.03500000

N -4.41800000 -4.27000000 0.87800000

O -5.40000000 -5.04500000 1.26000000

O -3.35100000 -4.91500000 1.28900000

C -7.03900000 -3.16600000 -0.05500000

C -7.26200000 -4.52400000 -0.76800000

C -8.17500000 -2.28900000 -0.68300000

C -7.41500000 -3.11400000 1.45000000

C -4.31600000 0.32700000 -2.24800000

C -4.97500000 0.03300000 -3.61400000

C -2.90400000 0.88200000 -2.54200000

C -5.10400000 1.43600000 -1.51500000

N 2.02400000 8.01700000 0.00200000

O 3.03800000 7.23900000 0.29800000

O 2.51600000 9.22500000 -0.15100000

H -0.49900000 1.93800000 2.27200000

H -2.11800000 5.11100000 2.35700000

H -0.55200000 4.29900000 2.44300000

H 6.05300000 1.26200000 0.02100000

H 5.00700000 1.41900000 -1.43700000

H 7.84500000 0.21800000 -1.41600000

H 6.77100000 0.36200000 -2.85700000

H 4.58900000 5.20100000 -1.91900000

H 4.11200000 3.46500000 -1.96300000

H 6.42000000 4.86000000 -0.56900000

H 5.64400000 3.60500000 0.41800000

H 6.63900000 3.04000000 -2.46000000

H 7.67800000 2.86300000 -1.00600000

H -2.17300000 9.00500000 -0.31200000

H 0.47100000 3.20300000 0.54800000

H -0.06300000 3.61000000 -1.15800000

H -0.84800000 2.37300000 -0.14900000

H -2.60700000 4.46100000 -1.42600000

H -3.59600000 4.43600000 0.10300000

H -2.82900000 3.01900000 -0.40800000

H 4.07300000 -0.86500000 -2.33000000

H -1.55000000 -3.86100000 0.04300000

H -2.00200000 -3.21700000 1.66400000

H -2.26100000 -1.02600000 -1.08900000

H -6.36000000 -1.06000000 -1.46400000

H 0.76600000 10.20400000 -1.43800000

H -0.78800000 10.64400000 -0.74700000

H 0.58900000 10.56800000 0.35600000

H -3.80700000 7.80900000 0.45700000

H -3.79300000 6.48900000 -0.71100000

H -3.59000000 6.23200000 1.11300000

H -3.01800000 -0.08700000 1.39500000

H -2.53000000 -1.35400000 2.59100000

H -2.88400000 0.80000000 3.74800000

H -1.18200000 0.27800000 3.84700000

H -0.00900000 -2.70700000 -1.22200000

H 0.89400000 -1.38900000 -0.50000000

H 1.00700000 -4.31400000 0.14600000

H 0.94500000 -3.24700000 1.58600000

H 3.28100000 -3.66800000 1.04200000

H 2.87400000 -1.95300000 0.75700000

H 2.62500000 -2.60000000 -1.76600000

H 3.41300000 -4.14800000 -1.33600000

H -7.18900000 -4.40100000 -1.87200000

H -6.54000000 -5.32900000 -0.54200000

H -8.27000000 -4.94100000 -0.54200000

H -8.12900000 -2.23800000 -1.79500000

H -9.18300000 -2.70600000 -0.46100000

H -8.19600000 -1.25000000 -0.28200000

H -8.41800000 -3.56200000 1.63500000

H -6.72700000 -3.61100000 2.15600000

H -7.44600000 -2.05900000 1.80800000

H -4.95100000 0.92800000 -4.27500000

H -4.44300000 -0.79100000 -4.14200000

H -6.04400000 -0.26100000 -3.52800000

H -2.34800000 1.13400000 -1.61300000

H -2.30100000 0.16200000 -3.13600000

H -2.94700000 1.81900000 -3.14200000

H -5.05800000 2.40200000 -2.06500000

H -6.18300000 1.19300000 -1.39800000

H -4.69200000 1.60500000 -0.49400000

O 0.30800000 -5.78000000 -2.21700000

O 0.31200000 -6.71500000 0.80200000

O 1.47200000 -5.38800000 3.05600000

O 2.67900000 -2.92900000 3.87500000

O 2.44600000 -0.10300000 2.56500000

O 2.51600000 0.51600000 -0.40000000

O 1.36900000 -0.49500000 -2.95400000

O 0.87100000 -3.36100000 -3.55600000

C 2.30600000 -5.28000000 4.18400000

C 3.33000000 -4.17300000 3.98200000

C 3.58400000 -1.84800000 3.86700000

C 2.81800000 -0.53100000 3.85500000

C 3.50300000 0.47500000 1.83200000

C 2.95300000 1.30700000 0.68200000

C 2.15500000 1.28700000 -1.52700000

C 0.98300000 0.68400000 -2.28700000

C 0.31600000 -1.02600000 -3.72400000

C 0.75400000 -2.28500000 -4.45700000

C 0.95900000 -4.59900000 -4.21700000

C 1.27800000 -5.71800000 -3.23600000

C 0.29900000 -7.03200000 -1.56900000

C -0.53400000 -6.96600000 -0.29500000

C -0.39600000 -6.45500000 1.98800000

C 0.56000000 -6.45400000 3.17200000

H 1.68600000 -5.06000000 5.08400000

H 2.83900000 -6.24800000 4.33800000

H 4.01100000 -4.16000000 4.86500000

H 3.93900000 -4.36200000 3.06900000

H 4.18600000 -1.88900000 4.80500000

H 4.28000000 -1.94400000 3.00500000

H 1.87600000 -0.64800000 4.44100000

H 3.39000000 0.27500000 4.36600000

H 4.07800000 1.16400000 2.49400000

H 4.20200000 -0.30500000 1.46000000

H 2.11300000 1.93300000 1.05400000

H 3.75700000 1.98500000 0.32600000

H 1.87300000 2.31500000 -1.21500000

H 3.02800000 1.37600000 -2.21000000

H 0.13400000 0.47700000 -1.59900000

H 0.63600000 1.42700000 -3.04500000

H 0.00100000 -0.26400000 -4.47500000

H -0.55000000 -1.26100000 -3.06500000

H 1.72800000 -2.12300000 -4.97200000

H -0.02200000 -2.53200000 -5.22000000

H -0.01400000 -4.81200000 -4.72000000

H 1.76400000 -4.55000000 -4.98800000

H 1.29600000 -6.68000000 -3.80200000

H 2.27800000 -5.56200000 -2.77200000

H 1.34000000 -7.35100000 -1.33400000

H -0.15000000 -7.77500000 -2.27000000

H -1.04000000 -7.94600000 -0.12300000

H -1.31300000 -6.17500000 -0.37600000

H -1.16800000 -7.24400000 2.14100000

H -0.89500000 -5.46300000 1.90700000

H 1.11600000 -7.41800000 3.21400000

H -0.02900000 -6.33200000 4.11100000

C 0.41000000 7.28300000 3.42400000

H -0.62400000 7.25200000 3.01500000

H 0.95500000 8.15000000 2.98700000

H 0.36700000 7.39000000 4.53100000

H 0.94300000 6.34100000 3.16400000

**8. References**

[S1] Chen, W., Guo, C., Ding, H., Yang, X. & Zhang, K. Controlled ring-opening polymerization of macrocyclic monomers based on ring-opening/ring-closing cascade reaction. *J. Am. Chem. Soc.* **145**, 25022–25030 (2023).

[S2] Newman, S. G. & Lautens, M. The Role of Reversible Oxidative Addition in Selective Palladium(0)-Catalyzed Intramolecular Cross-Couplings of Polyhalogenated Substrates: Synthesis of Brominated Indoles. *J. Am. Chem. Soc.* **132**, 11416–11417 (2010).

[S3] Cheng, Z. *et al.* Multivalency for Modularity: A Versatile Adhesive with Cooperatively Activated Fast Dismantlability. *ACS Appl. Polym. Mater.* **4***,* 6812–6816 (2022).

[S4] Kupai, J., Rojik, E., Huszthy, P. & Szekely G*.* Role of Chirality and Macroring in Imprinted Polymers with Enantiodiscriminative Power. *ACS Appl. Mater. Interfaces.* **7***,* 9516–9525 (2015).

[S5] Rodríguez-Rubio, A., Savoini, A., Modicom, F., Butler, P. & Goldup, S. M. A Co-conformationally “Topologically” Chiral Catenane. *J. Am. Chem. Soc.* **144**, 11927–11932 (2022).

[S6] Stenström, P. *et al.* Synthesis and in Vitro Evaluation of Monodisperse Amino-Functional Polyester Dendrimers with Rapid Degradability and Antibacterial Properties. *Biomacromolecules* **18**, 4323–4330 (2017).

[S7] Frisch, M. J., Trucks, G. W., Schlegel, H. B., Scuseria, G. E., Robb, M. A., Cheeseman, J. R., Scalmani, G., Barone, V., Petersson, G. A., Nakatsuji, H., Li, X., Caricato, M., Marenich, A. V., Bloino, J., Janesko, B. G., Gomperts, R., Mennucci, B., Hratchian, H. P., Ortiz, J. V., Izmaylov, A. F., Sonnenberg, J. L., Williams-Young, D., Ding, F., Lipparini, F., Egidi, F., Goings, J., Peng, B., Petrone, A., Henderson, T., Ranasinghe, D., Zakrzewski, V. G., Gao, J., Rega, N., Zheng, G., Liang, W., Hada, M., Ehara, M., Toyota, K., Fukuda, R., Hasegawa, J., Ishida, M., Nakajima, T., Honda, Y., Kitao, O., Nakai, H., Vreven, T., Throssell, K., Montgomery, J. A., Jr., Peralta, J. E., Ogliaro, F., Bearpark, M. J., Heyd, J. J., Brothers, E. N., Kudin, K. N., Staroverov, V. N., Keith, T. A., Kobayashi, R., Normand, J., Raghavachari, K., Rendell, A. P., Burant, J. C., Iyengar, S. S., Tomasi, J., Cossi, M., Millam, J. M., Klene, M., Adamo, C., Cammi, R., Ochterski, J. W., Martin, R. L., Morokuma, K., Farkas, O., Foresman, J. B. & Fox, D. J. Gaussian, Inc., Wallingford CT, 2016.
